# Supplementary material for: Molecular Phylogeny and Evolution of the Tuerkayana (Decapoda: Brachyura: Gecarcinidae) Genus Based on Whole Mitochondrial Genome Sequences
Source: MDPI journal article supplement (doi:10.3390/biology12070974), 2023-07-08

A

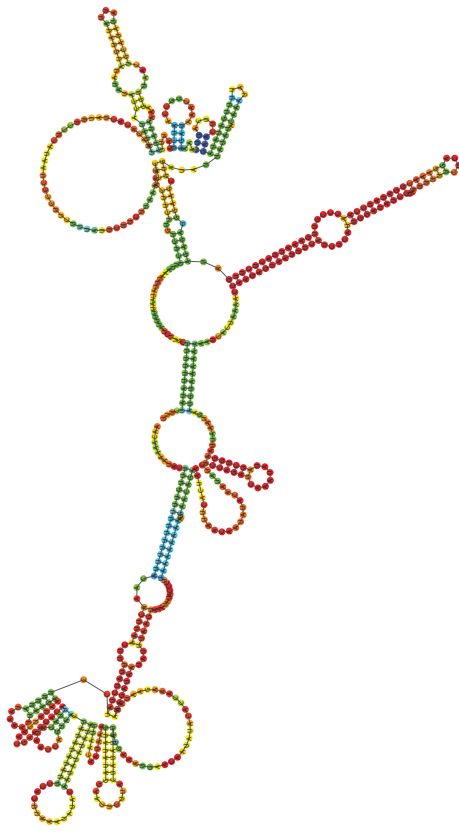

B

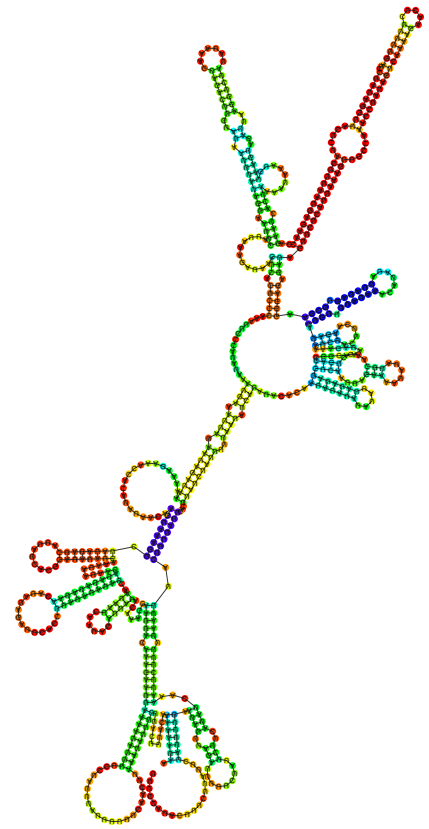

C

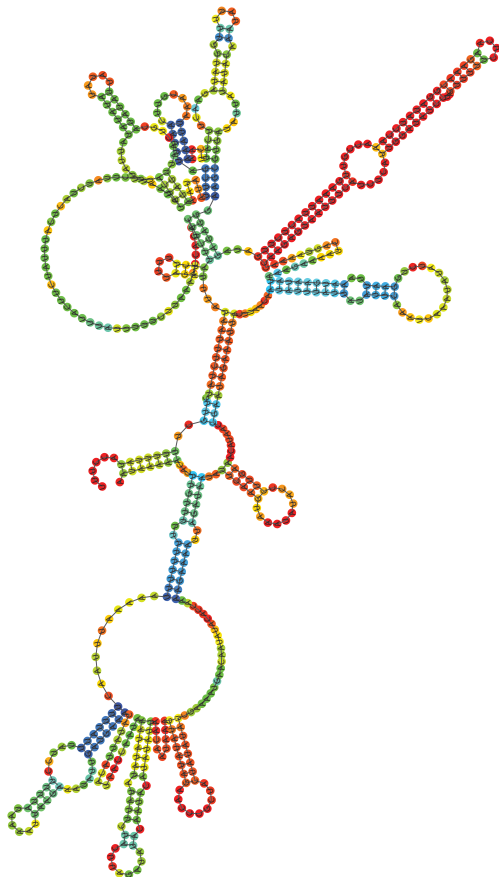

D

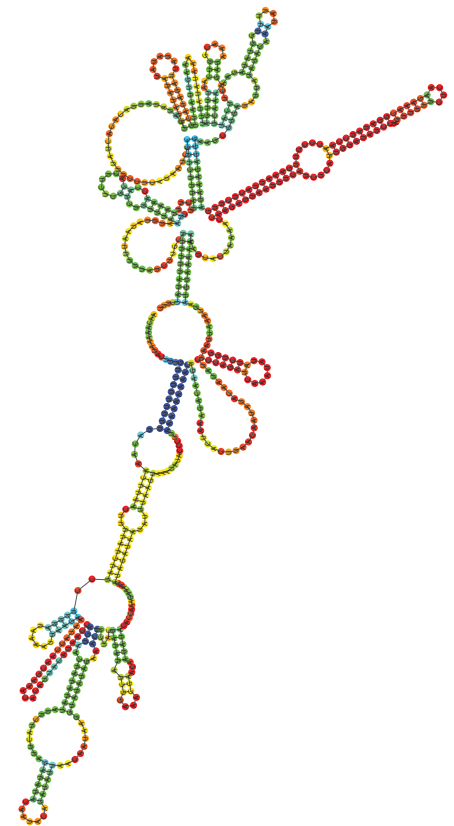A: *Tuerkayana magnum\_CR*B: *Tuerkayana rotunda\_CR*C: *Tuerkayana hirtipes\_CR*D: *Tuerkayana celeste\_CR*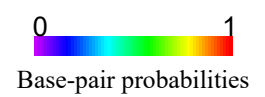

Supplement: s1 [file s1]
