# Supplementary material for: Molecular Phylogeny and Evolution of the Tuerkayana (Decapoda: Brachyura: Gecarcinidae) Genus Based on Whole Mitochondrial Genome Sequences
Source: MDPI journal article supplement (doi:10.3390/biology12070974), 2023-07-08
Supplement: s1 [file s1]

# ancestor of Brachyura

|             |              |             |             |             |             |             |             |             |             |             |             |             |              |             |             |             |             |             |              |             |             |             |            |              |             |              |             |             |             |           |             |             |             |             |             |             |             |
|-------------|--------------|-------------|-------------|-------------|-------------|-------------|-------------|-------------|-------------|-------------|-------------|-------------|--------------|-------------|-------------|-------------|-------------|-------------|--------------|-------------|-------------|-------------|------------|--------------|-------------|--------------|-------------|-------------|-------------|-----------|-------------|-------------|-------------|-------------|-------------|-------------|-------------|
| <i>cux1</i> | <i>trnL2</i> | <i>cux2</i> | <i>trnk</i> | <i>trnD</i> | <i>atp8</i> | <i>atp6</i> | <i>cux3</i> | <i>trnG</i> | <i>nad3</i> | <i>trnA</i> | <i>trnR</i> | <i>trnN</i> | <i>trnS1</i> | <i>trnE</i> | <i>trnH</i> | <i>trnF</i> | <i>nad5</i> | <i>nad4</i> | <i>nad4L</i> | <i>trnT</i> | <i>trnP</i> | <i>nad6</i> | <i>cob</i> | <i>trnS2</i> | <i>nad1</i> | <i>trnL1</i> | <i>rrnL</i> | <i>trnV</i> | <i>rrnS</i> | <b>CR</b> | <i>trnI</i> | <i>trnQ</i> | <i>trnM</i> | <i>nad2</i> | <i>trnW</i> | <i>trnC</i> | <i>trnY</i> |
|-------------|--------------|-------------|-------------|-------------|-------------|-------------|-------------|-------------|-------------|-------------|-------------|-------------|--------------|-------------|-------------|-------------|-------------|-------------|--------------|-------------|-------------|-------------|------------|--------------|-------------|--------------|-------------|-------------|-------------|-----------|-------------|-------------|-------------|-------------|-------------|-------------|-------------|

## Gecarcinidae

### *Tuerkayana magnum*

|             |              |             |             |             |             |             |             |             |             |             |             |             |              |             |             |             |             |             |              |             |             |             |            |              |             |              |             |             |             |           |             |             |             |             |             |             |             |
|-------------|--------------|-------------|-------------|-------------|-------------|-------------|-------------|-------------|-------------|-------------|-------------|-------------|--------------|-------------|-------------|-------------|-------------|-------------|--------------|-------------|-------------|-------------|------------|--------------|-------------|--------------|-------------|-------------|-------------|-----------|-------------|-------------|-------------|-------------|-------------|-------------|-------------|
| <i>cux1</i> | <i>trnL2</i> | <i>cux2</i> | <i>trnk</i> | <i>trnD</i> | <i>atp8</i> | <i>atp6</i> | <i>cux3</i> | <i>trnG</i> | <i>nad3</i> | <i>trnA</i> | <i>trnR</i> | <i>trnN</i> | <i>trnS1</i> | <i>trnE</i> | <i>trnH</i> | <i>trnF</i> | <i>nad5</i> | <i>nad4</i> | <i>nad4L</i> | <i>trnT</i> | <i>trnP</i> | <i>nad6</i> | <i>cob</i> | <i>trnS2</i> | <i>nad1</i> | <i>trnL1</i> | <i>rrnL</i> | <i>trnV</i> | <i>rrnS</i> | <b>CR</b> | <i>trnI</i> | <i>trnQ</i> | <i>trnM</i> | <i>nad2</i> | <i>trnW</i> | <i>trnC</i> | <i>trnY</i> |
|-------------|--------------|-------------|-------------|-------------|-------------|-------------|-------------|-------------|-------------|-------------|-------------|-------------|--------------|-------------|-------------|-------------|-------------|-------------|--------------|-------------|-------------|-------------|------------|--------------|-------------|--------------|-------------|-------------|-------------|-----------|-------------|-------------|-------------|-------------|-------------|-------------|-------------|

### *Tuerkayana rotunda*

|             |              |             |             |             |             |             |             |             |             |             |             |             |              |             |             |             |             |             |              |             |             |             |            |              |             |              |             |             |             |           |             |             |             |             |             |             |             |
|-------------|--------------|-------------|-------------|-------------|-------------|-------------|-------------|-------------|-------------|-------------|-------------|-------------|--------------|-------------|-------------|-------------|-------------|-------------|--------------|-------------|-------------|-------------|------------|--------------|-------------|--------------|-------------|-------------|-------------|-----------|-------------|-------------|-------------|-------------|-------------|-------------|-------------|
| <i>cux1</i> | <i>trnL2</i> | <i>cux2</i> | <i>trnk</i> | <i>trnD</i> | <i>atp8</i> | <i>atp6</i> | <i>cux3</i> | <i>trnG</i> | <i>nad3</i> | <i>trnA</i> | <i>trnR</i> | <i>trnN</i> | <i>trnS1</i> | <i>trnE</i> | <i>trnH</i> | <i>trnF</i> | <i>nad5</i> | <i>nad4</i> | <i>nad4L</i> | <i>trnT</i> | <i>trnP</i> | <i>nad6</i> | <i>cob</i> | <i>trnS2</i> | <i>nad1</i> | <i>trnL1</i> | <i>rrnL</i> | <i>trnV</i> | <i>rrnS</i> | <b>CR</b> | <i>trnI</i> | <i>trnQ</i> | <i>trnM</i> | <i>nad2</i> | <i>trnW</i> | <i>trnC</i> | <i>trnY</i> |
|-------------|--------------|-------------|-------------|-------------|-------------|-------------|-------------|-------------|-------------|-------------|-------------|-------------|--------------|-------------|-------------|-------------|-------------|-------------|--------------|-------------|-------------|-------------|------------|--------------|-------------|--------------|-------------|-------------|-------------|-----------|-------------|-------------|-------------|-------------|-------------|-------------|-------------|

### *Tuerkayana hirtipes*

|             |              |             |             |             |             |             |             |             |             |             |             |             |              |             |             |             |             |             |              |             |             |             |            |              |             |              |             |             |             |           |             |             |             |             |             |             |             |
|-------------|--------------|-------------|-------------|-------------|-------------|-------------|-------------|-------------|-------------|-------------|-------------|-------------|--------------|-------------|-------------|-------------|-------------|-------------|--------------|-------------|-------------|-------------|------------|--------------|-------------|--------------|-------------|-------------|-------------|-----------|-------------|-------------|-------------|-------------|-------------|-------------|-------------|
| <i>cux1</i> | <i>trnL2</i> | <i>cux2</i> | <i>trnk</i> | <i>trnD</i> | <i>atp8</i> | <i>atp6</i> | <i>cux3</i> | <i>trnG</i> | <i>nad3</i> | <i>trnA</i> | <i>trnR</i> | <i>trnN</i> | <i>trnS1</i> | <i>trnE</i> | <i>trnH</i> | <i>trnF</i> | <i>nad5</i> | <i>nad4</i> | <i>nad4L</i> | <i>trnT</i> | <i>trnP</i> | <i>nad6</i> | <i>cob</i> | <i>trnS2</i> | <i>nad1</i> | <i>trnL1</i> | <i>rrnL</i> | <i>trnV</i> | <i>rrnS</i> | <b>CR</b> | <i>trnI</i> | <i>trnQ</i> | <i>trnM</i> | <i>nad2</i> | <i>trnW</i> | <i>trnC</i> | <i>trnY</i> |
|-------------|--------------|-------------|-------------|-------------|-------------|-------------|-------------|-------------|-------------|-------------|-------------|-------------|--------------|-------------|-------------|-------------|-------------|-------------|--------------|-------------|-------------|-------------|------------|--------------|-------------|--------------|-------------|-------------|-------------|-----------|-------------|-------------|-------------|-------------|-------------|-------------|-------------|

### *Tuerkayana celeste*

|             |              |             |             |             |             |             |             |             |             |             |             |             |              |             |             |             |             |             |              |             |             |             |            |              |             |              |             |             |             |           |             |             |             |             |             |             |             |
|-------------|--------------|-------------|-------------|-------------|-------------|-------------|-------------|-------------|-------------|-------------|-------------|-------------|--------------|-------------|-------------|-------------|-------------|-------------|--------------|-------------|-------------|-------------|------------|--------------|-------------|--------------|-------------|-------------|-------------|-----------|-------------|-------------|-------------|-------------|-------------|-------------|-------------|
| <i>cux1</i> | <i>trnL2</i> | <i>cux2</i> | <i>trnk</i> | <i>trnD</i> | <i>atp8</i> | <i>atp6</i> | <i>cux3</i> | <i>trnG</i> | <i>nad3</i> | <i>trnA</i> | <i>trnR</i> | <i>trnN</i> | <i>trnS1</i> | <i>trnE</i> | <i>trnH</i> | <i>trnF</i> | <i>nad5</i> | <i>nad4</i> | <i>nad4L</i> | <i>trnT</i> | <i>trnP</i> | <i>nad6</i> | <i>cob</i> | <i>trnS2</i> | <i>nad1</i> | <i>trnL1</i> | <i>rrnL</i> | <i>trnV</i> | <i>rrnS</i> | <b>CR</b> | <i>trnI</i> | <i>trnQ</i> | <i>trnM</i> | <i>nad2</i> | <i>trnW</i> | <i>trnC</i> | <i>trnY</i> |
|-------------|--------------|-------------|-------------|-------------|-------------|-------------|-------------|-------------|-------------|-------------|-------------|-------------|--------------|-------------|-------------|-------------|-------------|-------------|--------------|-------------|-------------|-------------|------------|--------------|-------------|--------------|-------------|-------------|-------------|-----------|-------------|-------------|-------------|-------------|-------------|-------------|-------------|

### *Cardisoma carmifer*

|             |              |             |             |             |             |             |             |             |             |             |             |             |              |             |             |             |             |             |              |             |             |             |            |              |             |              |             |             |             |           |             |             |             |             |             |             |             |
|-------------|--------------|-------------|-------------|-------------|-------------|-------------|-------------|-------------|-------------|-------------|-------------|-------------|--------------|-------------|-------------|-------------|-------------|-------------|--------------|-------------|-------------|-------------|------------|--------------|-------------|--------------|-------------|-------------|-------------|-----------|-------------|-------------|-------------|-------------|-------------|-------------|-------------|
| <i>cux1</i> | <i>trnL2</i> | <i>cux2</i> | <i>trnk</i> | <i>trnD</i> | <i>atp8</i> | <i>atp6</i> | <i>cux3</i> | <i>trnG</i> | <i>nad3</i> | <i>trnA</i> | <i>trnR</i> | <i>trnN</i> | <i>trnS1</i> | <i>trnE</i> | <i>trnH</i> | <i>trnF</i> | <i>nad5</i> | <i>nad4</i> | <i>nad4L</i> | <i>trnT</i> | <i>trnP</i> | <i>nad6</i> | <i>cob</i> | <i>trnS2</i> | <i>nad1</i> | <i>trnL1</i> | <i>rrnL</i> | <i>trnV</i> | <i>rrnS</i> | <b>CR</b> | <i>trnI</i> | <i>trnQ</i> | <i>trnM</i> | <i>nad2</i> | <i>trnW</i> | <i>trnC</i> | <i>trnY</i> |
|-------------|--------------|-------------|-------------|-------------|-------------|-------------|-------------|-------------|-------------|-------------|-------------|-------------|--------------|-------------|-------------|-------------|-------------|-------------|--------------|-------------|-------------|-------------|------------|--------------|-------------|--------------|-------------|-------------|-------------|-----------|-------------|-------------|-------------|-------------|-------------|-------------|-------------|

### *Cardisoma armatum*

|             |              |             |             |             |             |             |             |             |             |             |             |             |              |             |             |             |             |             |              |             |             |             |            |              |             |              |             |             |             |           |             |             |             |             |             |             |             |
|-------------|--------------|-------------|-------------|-------------|-------------|-------------|-------------|-------------|-------------|-------------|-------------|-------------|--------------|-------------|-------------|-------------|-------------|-------------|--------------|-------------|-------------|-------------|------------|--------------|-------------|--------------|-------------|-------------|-------------|-----------|-------------|-------------|-------------|-------------|-------------|-------------|-------------|
| <i>cux1</i> | <i>trnL2</i> | <i>cux2</i> | <i>trnk</i> | <i>trnD</i> | <i>atp8</i> | <i>atp6</i> | <i>cux3</i> | <i>trnG</i> | <i>nad3</i> | <i>trnA</i> | <i>trnR</i> | <i>trnN</i> | <i>trnS1</i> | <i>trnE</i> | <i>trnH</i> | <i>trnF</i> | <i>nad5</i> | <i>nad4</i> | <i>nad4L</i> | <i>trnT</i> | <i>trnP</i> | <i>nad6</i> | <i>cob</i> | <i>trnS2</i> | <i>nad1</i> | <i>trnL1</i> | <i>rrnL</i> | <i>trnV</i> | <i>rrnS</i> | <b>CR</b> | <i>trnI</i> | <i>trnQ</i> | <i>trnM</i> | <i>nad2</i> | <i>trnW</i> | <i>trnC</i> | <i>trnY</i> |
|-------------|--------------|-------------|-------------|-------------|-------------|-------------|-------------|-------------|-------------|-------------|-------------|-------------|--------------|-------------|-------------|-------------|-------------|-------------|--------------|-------------|-------------|-------------|------------|--------------|-------------|--------------|-------------|-------------|-------------|-----------|-------------|-------------|-------------|-------------|-------------|-------------|-------------|

### *Gecarcodend laudarii*

|             |              |             |             |             |             |             |             |             |             |             |             |             |              |             |             |             |             |             |              |             |             |             |            |              |             |              |             |             |             |           |             |             |             |             |             |             |             |
|-------------|--------------|-------------|-------------|-------------|-------------|-------------|-------------|-------------|-------------|-------------|-------------|-------------|--------------|-------------|-------------|-------------|-------------|-------------|--------------|-------------|-------------|-------------|------------|--------------|-------------|--------------|-------------|-------------|-------------|-----------|-------------|-------------|-------------|-------------|-------------|-------------|-------------|
| <i>cux1</i> | <i>trnL2</i> | <i>cux2</i> | <i>trnk</i> | <i>trnD</i> | <i>atp8</i> | <i>atp6</i> | <i>cux3</i> | <i>trnG</i> | <i>nad3</i> | <i>trnA</i> | <i>trnR</i> | <i>trnN</i> | <i>trnS1</i> | <i>trnE</i> | <i>trnH</i> | <i>trnF</i> | <i>nad5</i> | <i>nad4</i> | <i>nad4L</i> | <i>trnT</i> | <i>trnP</i> | <i>nad6</i> | <i>cob</i> | <i>trnS2</i> | <i>nad1</i> | <i>trnL1</i> | <i>rrnL</i> | <i>trnV</i> | <i>rrnS</i> | <b>CR</b> | <i>trnI</i> | <i>trnQ</i> | <i>trnM</i> | <i>nad2</i> | <i>trnW</i> | <i>trnC</i> | <i>trnY</i> |
|-------------|--------------|-------------|-------------|-------------|-------------|-------------|-------------|-------------|-------------|-------------|-------------|-------------|--------------|-------------|-------------|-------------|-------------|-------------|--------------|-------------|-------------|-------------|------------|--------------|-------------|--------------|-------------|-------------|-------------|-----------|-------------|-------------|-------------|-------------|-------------|-------------|-------------|

### *Gecarcodend natalis*

|             |              |             |             |             |             |             |             |             |             |             |             |             |              |             |             |             |             |             |              |             |             |             |            |              |             |              |             |             |             |           |             |             |             |             |             |             |             |
|-------------|--------------|-------------|-------------|-------------|-------------|-------------|-------------|-------------|-------------|-------------|-------------|-------------|--------------|-------------|-------------|-------------|-------------|-------------|--------------|-------------|-------------|-------------|------------|--------------|-------------|--------------|-------------|-------------|-------------|-----------|-------------|-------------|-------------|-------------|-------------|-------------|-------------|
| <i>cux1</i> | <i>trnL2</i> | <i>cux2</i> | <i>trnk</i> | <i>trnD</i> | <i>atp8</i> | <i>atp6</i> | <i>cux3</i> | <i>trnG</i> | <i>nad3</i> | <i>trnA</i> | <i>trnR</i> | <i>trnN</i> | <i>trnS1</i> | <i>trnE</i> | <i>trnH</i> | <i>trnF</i> | <i>nad5</i> | <i>nad4</i> | <i>nad4L</i> | <i>trnT</i> | <i>trnP</i> | <i>nad6</i> | <i>cob</i> | <i>trnS2</i> | <i>nad1</i> | <i>trnL1</i> | <i>rrnL</i> | <i>trnV</i> | <i>rrnS</i> | <b>CR</b> | <i>trnI</i> | <i>trnQ</i> | <i>trnM</i> | <i>nad2</i> | <i>trnW</i> | <i>trnC</i> | <i>trnY</i> |
|-------------|--------------|-------------|-------------|-------------|-------------|-------------|-------------|-------------|-------------|-------------|-------------|-------------|--------------|-------------|-------------|-------------|-------------|-------------|--------------|-------------|-------------|-------------|------------|--------------|-------------|--------------|-------------|-------------|-------------|-----------|-------------|-------------|-------------|-------------|-------------|-------------|-------------|

## Sesarmidae

### *Clisocotoma sinense*

|             |              |             |             |             |             |             |             |             |             |             |             |             |              |             |             |             |             |             |              |             |             |             |            |              |             |              |             |             |             |           |             |             |             |             |             |             |             |
|-------------|--------------|-------------|-------------|-------------|-------------|-------------|-------------|-------------|-------------|-------------|-------------|-------------|--------------|-------------|-------------|-------------|-------------|-------------|--------------|-------------|-------------|-------------|------------|--------------|-------------|--------------|-------------|-------------|-------------|-----------|-------------|-------------|-------------|-------------|-------------|-------------|-------------|
| <i>cux1</i> | <i>trnL2</i> | <i>cux2</i> | <i>trnk</i> | <i>trnD</i> | <i>atp8</i> | <i>atp6</i> | <i>cux3</i> | <i>trnG</i> | <i>nad3</i> | <i>trnA</i> | <i>trnR</i> | <i>trnN</i> | <i>trnS1</i> | <i>trnE</i> | <i>trnH</i> | <i>trnF</i> | <i>nad5</i> | <i>nad4</i> | <i>nad4L</i> | <i>trnT</i> | <i>trnP</i> | <i>nad6</i> | <i>cob</i> | <i>trnS2</i> | <i>nad1</i> | <i>trnL1</i> | <i>rrnL</i> | <i>trnV</i> | <i>rrnS</i> | <b>CR</b> | <i>trnQ</i> | <i>trnI</i> | <i>trnM</i> | <i>nad2</i> | <i>trnW</i> | <i>trnC</i> | <i>trnY</i> |
|-------------|--------------|-------------|-------------|-------------|-------------|-------------|-------------|-------------|-------------|-------------|-------------|-------------|--------------|-------------|-------------|-------------|-------------|-------------|--------------|-------------|-------------|-------------|------------|--------------|-------------|--------------|-------------|-------------|-------------|-----------|-------------|-------------|-------------|-------------|-------------|-------------|-------------|

### *Metapallias depressus*

|             |              |             |             |             |             |             |             |             |             |             |             |             |              |             |             |             |             |             |              |             |             |             |            |              |             |              |             |             |             |           |             |             |             |             |             |             |             |
|-------------|--------------|-------------|-------------|-------------|-------------|-------------|-------------|-------------|-------------|-------------|-------------|-------------|--------------|-------------|-------------|-------------|-------------|-------------|--------------|-------------|-------------|-------------|------------|--------------|-------------|--------------|-------------|-------------|-------------|-----------|-------------|-------------|-------------|-------------|-------------|-------------|-------------|
| <i>cux1</i> | <i>trnL2</i> | <i>cux2</i> | <i>trnk</i> | <i>trnD</i> | <i>atp8</i> | <i>atp6</i> | <i>cux3</i> | <i>trnG</i> | <i>nad3</i> | <i>trnA</i> | <i>trnR</i> | <i>trnN</i> | <i>trnS1</i> | <i>trnE</i> | <i>trnH</i> | <i>trnF</i> | <i>nad5</i> | <i>nad4</i> | <i>nad4L</i> | <i>trnT</i> | <i>trnP</i> | <i>nad6</i> | <i>cob</i> | <i>trnS2</i> | <i>nad1</i> | <i>trnL1</i> | <i>rrnL</i> | <i>trnV</i> | <i>rrnS</i> | <b>CR</b> | <i>trnQ</i> | <i>trnI</i> | <i>trnM</i> | <i>nad2</i> | <i>trnW</i> | <i>trnC</i> | <i>trnY</i> |
|-------------|--------------|-------------|-------------|-------------|-------------|-------------|-------------|-------------|-------------|-------------|-------------|-------------|--------------|-------------|-------------|-------------|-------------|-------------|--------------|-------------|-------------|-------------|------------|--------------|-------------|--------------|-------------|-------------|-------------|-----------|-------------|-------------|-------------|-------------|-------------|-------------|-------------|

### *Nanosesarma minutum*

|             |              |             |             |             |             |             |             |             |             |             |             |             |              |             |             |             |             |             |              |             |             |             |            |              |             |              |             |             |             |           |             |             |             |             |             |             |             |
|-------------|--------------|-------------|-------------|-------------|-------------|-------------|-------------|-------------|-------------|-------------|-------------|-------------|--------------|-------------|-------------|-------------|-------------|-------------|--------------|-------------|-------------|-------------|------------|--------------|-------------|--------------|-------------|-------------|-------------|-----------|-------------|-------------|-------------|-------------|-------------|-------------|-------------|
| <i>cux1</i> | <i>trnL2</i> | <i>cux2</i> | <i>trnk</i> | <i>trnD</i> | <i>atp8</i> | <i>atp6</i> | <i>cux3</i> | <i>trnG</i> | <i>nad3</i> | <i>trnA</i> | <i>trnR</i> | <i>trnN</i> | <i>trnS1</i> | <i>trnE</i> | <i>trnH</i> | <i>trnF</i> | <i>nad5</i> | <i>nad4</i> | <i>nad4L</i> | <i>trnT</i> | <i>trnP</i> | <i>nad6</i> | <i>cob</i> | <i>trnS2</i> | <i>nad1</i> | <i>trnL1</i> | <i>rrnL</i> | <i>trnV</i> | <i>rrnS</i> | <b>CR</b> | <i>trnQ</i> | <i>trnI</i> | <i>trnM</i> | <i>nad2</i> | <i>trnW</i> | <i>trnC</i> | <i>trnY</i> |
|-------------|--------------|-------------|-------------|-------------|-------------|-------------|-------------|-------------|-------------|-------------|-------------|-------------|--------------|-------------|-------------|-------------|-------------|-------------|--------------|-------------|-------------|-------------|------------|--------------|-------------|--------------|-------------|-------------|-------------|-----------|-------------|-------------|-------------|-------------|-------------|-------------|-------------|

### *Perisesarma bidens*

|             |              |             |             |             |             |             |             |             |             |             |             |             |              |             |             |             |             |             |              |             |             |             |            |              |             |              |             |             |             |           |             |             |             |             |             |             |             |
|-------------|--------------|-------------|-------------|-------------|-------------|-------------|-------------|-------------|-------------|-------------|-------------|-------------|--------------|-------------|-------------|-------------|-------------|-------------|--------------|-------------|-------------|-------------|------------|--------------|-------------|--------------|-------------|-------------|-------------|-----------|-------------|-------------|-------------|-------------|-------------|-------------|-------------|
| <i>cux1</i> | <i>trnL2</i> | <i>cux2</i> | <i>trnk</i> | <i>trnD</i> | <i>atp8</i> | <i>atp6</i> | <i>cux3</i> | <i>trnG</i> | <i>nad3</i> | <i>trnA</i> | <i>trnR</i> | <i>trnN</i> | <i>trnS1</i> | <i>trnE</i> | <i>trnH</i> | <i>trnF</i> | <i>nad5</i> | <i>nad4</i> | <i>nad4L</i> | <i>trnT</i> | <i>trnP</i> | <i>nad6</i> | <i>cob</i> | <i>trnS2</i> | <i>nad1</i> | <i>trnL1</i> | <i>rrnL</i> | <i>trnV</i> | <i>rrnS</i> | <b>CR</b> | <i>trnQ</i> | <i>trnI</i> | <i>trnM</i> | <i>nad2</i> | <i>trnW</i> | <i>trnC</i> | <i>trnY</i> |
|-------------|--------------|-------------|-------------|-------------|-------------|-------------|-------------|-------------|-------------|-------------|-------------|-------------|--------------|-------------|-------------|-------------|-------------|-------------|--------------|-------------|-------------|-------------|------------|--------------|-------------|--------------|-------------|-------------|-------------|-----------|-------------|-------------|-------------|-------------|-------------|-------------|-------------|

### *Parasesarma affine*

|             |              |             |             |             |             |             |             |             |             |             |             |             |              |             |             |             |             |             |              |             |             |             |            |              |             |              |             |             |             |           |             |             |             |             |             |             |             |
|-------------|--------------|-------------|-------------|-------------|-------------|-------------|-------------|-------------|-------------|-------------|-------------|-------------|--------------|-------------|-------------|-------------|-------------|-------------|--------------|-------------|-------------|-------------|------------|--------------|-------------|--------------|-------------|-------------|-------------|-----------|-------------|-------------|-------------|-------------|-------------|-------------|-------------|
| <i>cux1</i> | <i>trnL2</i> | <i>cux2</i> | <i>trnk</i> | <i>trnD</i> | <i>atp8</i> | <i>atp6</i> | <i>cux3</i> | <i>trnG</i> | <i>nad3</i> | <i>trnA</i> | <i>trnR</i> | <i>trnN</i> | <i>trnS1</i> | <i>trnE</i> | <i>trnH</i> | <i>trnF</i> | <i>nad5</i> | <i>nad4</i> | <i>nad4L</i> | <i>trnT</i> | <i>trnP</i> | <i>nad6</i> | <i>cob</i> | <i>trnS2</i> | <i>nad1</i> | <i>trnL1</i> | <i>rrnL</i> | <i>trnV</i> | <i>rrnS</i> | <b>CR</b> | <i>trnQ</i> | <i>trnI</i> | <i>trnM</i> | <i>nad2</i> | <i>trnW</i> | <i>trnC</i> | <i>trnY</i> |
|-------------|--------------|-------------|-------------|-------------|-------------|-------------|-------------|-------------|-------------|-------------|-------------|-------------|--------------|-------------|-------------|-------------|-------------|-------------|--------------|-------------|-------------|-------------|------------|--------------|-------------|--------------|-------------|-------------|-------------|-----------|-------------|-------------|-------------|-------------|-------------|-------------|-------------|

### *Parasesarma tripunctis*

|             |              |             |             |             |             |             |             |             |             |             |             |             |              |             |             |             |             |             |              |             |             |             |            |              |             |              |             |             |             |           |             |             |             |             |             |             |             |
|-------------|--------------|-------------|-------------|-------------|-------------|-------------|-------------|-------------|-------------|-------------|-------------|-------------|--------------|-------------|-------------|-------------|-------------|-------------|--------------|-------------|-------------|-------------|------------|--------------|-------------|--------------|-------------|-------------|-------------|-----------|-------------|-------------|-------------|-------------|-------------|-------------|-------------|
| <i>cux1</i> | <i>trnL2</i> | <i>cux2</i> | <i>trnk</i> | <i>trnD</i> | <i>atp8</i> | <i>atp6</i> | <i>cux3</i> | <i>trnG</i> | <i>nad3</i> | <i>trnA</i> | <i>trnR</i> | <i>trnN</i> | <i>trnS1</i> | <i>trnE</i> | <i>trnH</i> | <i>trnF</i> | <i>nad5</i> | <i>nad4</i> | <i>nad4L</i> | <i>trnT</i> | <i>trnP</i> | <i>nad6</i> | <i>cob</i> | <i>trnS2</i> | <i>nad1</i> | <i>trnL1</i> | <i>rrnL</i> | <i>trnV</i> | <i>rrnS</i> | <b>CR</b> | <i>trnQ</i> | <i>trnI</i> | <i>trnM</i> | <i>nad2</i> | <i>trnW</i> | <i>trnC</i> | <i>trnY</i> |
|-------------|--------------|-------------|-------------|-------------|-------------|-------------|-------------|-------------|-------------|-------------|-------------|-------------|--------------|-------------|-------------|-------------|-------------|-------------|--------------|-------------|-------------|-------------|------------|--------------|-------------|--------------|-------------|-------------|-------------|-----------|-------------|-------------|-------------|-------------|-------------|-------------|-------------|

### *Parasesarma pictum*

|             |              |             |             |             |             |             |             |             |             |             |             |             |              |             |             |             |             |             |              |             |             |             |            |              |             |              |             |             |             |           |             |             |             |             |             |             |             |
|-------------|--------------|-------------|-------------|-------------|-------------|-------------|-------------|-------------|-------------|-------------|-------------|-------------|--------------|-------------|-------------|-------------|-------------|-------------|--------------|-------------|-------------|-------------|------------|--------------|-------------|--------------|-------------|-------------|-------------|-----------|-------------|-------------|-------------|-------------|-------------|-------------|-------------|
| <i>cux1</i> | <i>trnL2</i> | <i>cux2</i> | <i>trnk</i> | <i>trnD</i> | <i>atp8</i> | <i>atp6</i> | <i>cux3</i> | <i>trnG</i> | <i>nad3</i> | <i>trnA</i> | <i>trnR</i> | <i>trnN</i> | <i>trnS1</i> | <i>trnE</i> | <i>trnH</i> | <i>trnF</i> | <i>nad5</i> | <i>nad4</i> | <i>nad4L</i> | <i>trnT</i> | <i>trnP</i> | <i>nad6</i> | <i>cob</i> | <i>trnS2</i> | <i>nad1</i> | <i>trnL1</i> | <i>rrnL</i> | <i>trnV</i> | <i>rrnS</i> | <b>CR</b> | <i>trnQ</i> | <i>trnI</i> | <i>trnM</i> | <i>nad2</i> | <i>trnW</i> | <i>trnC</i> | <i>trnY</i> |
|-------------|--------------|-------------|-------------|-------------|-------------|-------------|-------------|-------------|-------------|-------------|-------------|-------------|--------------|-------------|-------------|-------------|-------------|-------------|--------------|-------------|-------------|-------------|------------|--------------|-------------|--------------|-------------|-------------|-------------|-----------|-------------|-------------|-------------|-------------|-------------|-------------|-------------|

### *Chromantes haematocheir*

|             |              |             |             |             |             |             |             |             |             |             |             |             |              |             |             |             |             |             |              |             |             |             |            |              |             |              |             |             |             |           |             |             |             |             |             |             |             |
|-------------|--------------|-------------|-------------|-------------|-------------|-------------|-------------|-------------|-------------|-------------|-------------|-------------|--------------|-------------|-------------|-------------|-------------|-------------|--------------|-------------|-------------|-------------|------------|--------------|-------------|--------------|-------------|-------------|-------------|-----------|-------------|-------------|-------------|-------------|-------------|-------------|-------------|
| <i>cux1</i> | <i>trnL2</i> | <i>cux2</i> | <i>trnk</i> | <i>trnD</i> | <i>atp8</i> | <i>atp6</i> | <i>cux3</i> | <i>trnG</i> | <i>nad3</i> | <i>trnA</i> | <i>trnR</i> | <i>trnN</i> | <i>trnS1</i> | <i>trnE</i> | <i>trnH</i> | <i>trnF</i> | <i>nad5</i> | <i>nad4</i> | <i>nad4L</i> | <i>trnT</i> | <i>trnP</i> | <i>nad6</i> | <i>cob</i> | <i>trnS2</i> | <i>nad1</i> | <i>trnL1</i> | <i>rrnL</i> | <i>trnV</i> | <i>rrnS</i> | <b>CR</b> | <i>trnQ</i> | <i>trnI</i> | <i>trnM</i> | <i>nad2</i> | <i>trnW</i> | <i>trnC</i> | <i>trnY</i> |
|-------------|--------------|-------------|-------------|-------------|-------------|-------------|-------------|-------------|-------------|-------------|-------------|-------------|--------------|-------------|-------------|-------------|-------------|-------------|--------------|-------------|-------------|-------------|------------|--------------|-------------|--------------|-------------|-------------|-------------|-----------|-------------|-------------|-------------|-------------|-------------|-------------|-------------|

### *Sesarmops sinensis*

|             |              |             |             |             |             |             |             |             |             |             |             |             |              |             |             |             |             |             |              |             |             |             |            |              |             |              |             |             |             |           |             |             |             |             |             |             |             |
|-------------|--------------|-------------|-------------|-------------|-------------|-------------|-------------|-------------|-------------|-------------|-------------|-------------|--------------|-------------|-------------|-------------|-------------|-------------|--------------|-------------|-------------|-------------|------------|--------------|-------------|--------------|-------------|-------------|-------------|-----------|-------------|-------------|-------------|-------------|-------------|-------------|-------------|
| <i>cux1</i> | <i>trnL2</i> | <i>cux2</i> | <i>trnk</i> | <i>trnD</i> | <i>atp8</i> | <i>atp6</i> | <i>cux3</i> | <i>trnG</i> | <i>nad3</i> | <i>trnA</i> | <i>trnR</i> | <i>trnN</i> | <i>trnS1</i> | <i>trnE</i> | <i>trnH</i> | <i>trnF</i> | <i>nad5</i> | <i>nad4</i> | <i>nad4L</i> | <i>trnT</i> | <i>trnP</i> | <i>nad6</i> | <i>cob</i> | <i>trnS2</i> | <i>nad1</i> | <i>trnL1</i> | <i>rrnL</i> | <i>trnV</i> | <i>rrnS</i> | <b>CR</b> | <i>trnQ</i> | <i>trnI</i> | <i>trnM</i> | <i>nad2</i> | <i>trnW</i> | <i>trnC</i> | <i>trnY</i> |
|-------------|--------------|-------------|-------------|-------------|-------------|-------------|-------------|-------------|-------------|-------------|-------------|-------------|--------------|-------------|-------------|-------------|-------------|-------------|--------------|-------------|-------------|-------------|------------|--------------|-------------|--------------|-------------|-------------|-------------|-----------|-------------|-------------|-------------|-------------|-------------|-------------|-------------|

### *Chromantes dehaani*

|             |              |             |             |             |             |             |             |             |             |             |             |             |              |             |             |             |             |             |              |             |             |             |            |              |             |              |             |             |             |           |             |             |             |             |             |             |             |
|-------------|--------------|-------------|-------------|-------------|-------------|-------------|-------------|-------------|-------------|-------------|-------------|-------------|--------------|-------------|-------------|-------------|-------------|-------------|--------------|-------------|-------------|-------------|------------|--------------|-------------|--------------|-------------|-------------|-------------|-----------|-------------|-------------|-------------|-------------|-------------|-------------|-------------|
| <i>cux1</i> | <i>trnL2</i> | <i>cux2</i> | <i>trnk</i> | <i>trnD</i> | <i>atp8</i> | <i>atp6</i> | <i>cux3</i> | <i>trnG</i> | <i>nad3</i> | <i>trnA</i> | <i>trnR</i> | <i>trnN</i> | <i>trnS1</i> | <i>trnE</i> | <i>trnH</i> | <i>trnF</i> | <i>nad5</i> | <i>nad4</i> | <i>nad4L</i> | <i>trnT</i> | <i>trnP</i> | <i>nad6</i> | <i>cob</i> | <i>trnS2</i> | <i>nad1</i> | <i>trnL1</i> | <i>rrnL</i> | <i>trnV</i> | <i>rrnS</i> | <b>CR</b> | <i>trnQ</i> | <i>trnI</i> | <i>trnM</i> | <i>nad2</i> | <i>trnW</i> | <i>trnC</i> | <i>trnY</i> |
|-------------|--------------|-------------|-------------|-------------|-------------|-------------|-------------|-------------|-------------|-------------|-------------|-------------|--------------|-------------|-------------|-------------|-------------|-------------|--------------|-------------|-------------|-------------|------------|--------------|-------------|--------------|-------------|-------------|-------------|-----------|-------------|-------------|-------------|-------------|-------------|-------------|-------------|

### *Sesarma neglectum*

|             |              |             |             |             |             |             |             |             |             |             |             |             |              |             |             |             |             |             |              |             |             |             |            |              |             |              |             |             |             |           |             |             |             |             |             |             |             |
|-------------|--------------|-------------|-------------|-------------|-------------|-------------|-------------|-------------|-------------|-------------|-------------|-------------|--------------|-------------|-------------|-------------|-------------|-------------|--------------|-------------|-------------|-------------|------------|--------------|-------------|--------------|-------------|-------------|-------------|-----------|-------------|-------------|-------------|-------------|-------------|-------------|-------------|
| <i>cux1</i> | <i>trnL2</i> | <i>cux2</i> | <i>trnk</i> | <i>trnD</i> | <i>atp8</i> | <i>atp6</i> | <i>cux3</i> | <i>trnG</i> | <i>nad3</i> | <i>trnA</i> | <i>trnR</i> | <i>trnN</i> | <i>trnS1</i> | <i>trnE</i> | <i>trnH</i> | <i>trnF</i> | <i>nad5</i> | <i>nad4</i> | <i>nad4L</i> | <i>trnT</i> | <i>trnP</i> | <i>nad6</i> | <i>cob</i> | <i>trnS2</i> | <i>nad1</i> | <i>trnL1</i> | <i>rrnL</i> | <i>trnV</i> | <i>rrnS</i> | <b>CR</b> | <i>trnQ</i> | <i>trnI</i> | <i>trnM</i> | <i>nad2</i> | <i>trnW</i> | <i>trnC</i> | <i>trnY</i> |
|-------------|--------------|-------------|-------------|-------------|-------------|-------------|-------------|-------------|-------------|-------------|-------------|-------------|--------------|-------------|-------------|-------------|-------------|-------------|--------------|-------------|-------------|-------------|------------|--------------|-------------|--------------|-------------|-------------|-------------|-----------|-------------|-------------|-------------|-------------|-------------|-------------|-------------|

### *Chromantes culmen*

|             |              |             |             |             |             |             |             |             |             |             |             |             |              |             |             |             |             |             |              |             |             |             |            |              |             |              |             |             |             |           |             |             |             |             |             |             |             |
|-------------|--------------|-------------|-------------|-------------|-------------|-------------|-------------|-------------|-------------|-------------|-------------|-------------|--------------|-------------|-------------|-------------|-------------|-------------|--------------|-------------|-------------|-------------|------------|--------------|-------------|--------------|-------------|-------------|-------------|-----------|-------------|-------------|-------------|-------------|-------------|-------------|-------------|
| <i>cux1</i> | <i>trnL2</i> | <i>cux2</i> | <i>trnk</i> | <i>trnD</i> | <i>atp8</i> | <i>atp6</i> | <i>cux3</i> | <i>trnG</i> | <i>nad3</i> | <i>trnA</i> | <i>trnR</i> | <i>trnN</i> | <i>trnS1</i> | <i>trnE</i> | <i>trnH</i> | <i>trnF</i> | <i>nad5</i> | <i>nad4</i> | <i>nad4L</i> | <i>trnT</i> | <i>trnP</i> | <i>nad6</i> | <i>cob</i> | <i>trnS2</i> | <i>nad1</i> | <i>trnL1</i> | <i>rrnL</i> | <i>trnV</i> | <i>rrnS</i> | <b>CR</b> | <i>trnQ</i> | <i>trnI</i> | <i>trnM</i> | <i>nad2</i> | <i>trnW</i> | <i>trnC</i> | <i>trnY</i> |
|-------------|--------------|-------------|-------------|-------------|-------------|-------------|-------------|-------------|-------------|-------------|-------------|-------------|--------------|-------------|-------------|-------------|-------------|-------------|--------------|-------------|-------------|-------------|------------|--------------|-------------|--------------|-------------|-------------|-------------|-----------|-------------|-------------|-------------|-------------|-------------|-------------|-------------|

## Xenograpsidae

### *Xenograpsus ngulama*

|             |              |             |             |             |             |             |             |             |             |             |              |             |             |             |            |              |             |             |             |             |              |             |             |              |             |             |             |           |             |             |             |             |             |             |             |             |             |
|-------------|--------------|-------------|-------------|-------------|-------------|-------------|-------------|-------------|-------------|-------------|--------------|-------------|-------------|-------------|------------|--------------|-------------|-------------|-------------|-------------|--------------|-------------|-------------|--------------|-------------|-------------|-------------|-----------|-------------|-------------|-------------|-------------|-------------|-------------|-------------|-------------|-------------|
| <i>cux1</i> | <i>trnL2</i> | <i>cux2</i> | <i>trnk</i> | <i>trnD</i> | <i>atp8</i> | <i>atp6</i> | <i>cux3</i> | <i>trnG</i> | <i>nad3</i> | <i>trnN</i> | <i>trnS1</i> | <i>trnE</i> | <i>trnT</i> | <i>nad6</i> | <i>cob</i> | <i>trnS2</i> | <i>trnH</i> | <i>trnF</i> | <i>nad5</i> | <i>nad4</i> | <i>nad4L</i> | <i>trnP</i> | <i>nad1</i> | <i>trnL1</i> | <i>rrnL</i> | <i>trnV</i> | <i>rrnS</i> | <b>CR</b> | <i>trnQ</i> | <i>trnM</i> | <i>nad2</i> | <i>trnC</i> | <i>trnY</i> | <i>trnA</i> | <i>trnR</i> | <i>trnI</i> | <i>trnW</i> |
|-------------|--------------|-------------|-------------|-------------|-------------|-------------|-------------|-------------|-------------|-------------|--------------|-------------|-------------|-------------|------------|--------------|-------------|-------------|-------------|-------------|--------------|-------------|-------------|--------------|-------------|-------------|-------------|-----------|-------------|-------------|-------------|-------------|-------------|-------------|-------------|-------------|-------------|

### *Xenograpsus testudinatus*

|             |              |             |             |             |             |             |             |             |             |             |                |
|-------------|--------------|-------------|-------------|-------------|-------------|-------------|-------------|-------------|-------------|-------------|----------------|
| <i>cux1</i> | <i>trnL2</i> | <i>cux2</i> | <i>trnk</i> | <i>trnD</i> | <i>atp8</i> | <i>atp6</i> | <i>cux3</i> | <i>trnG</i> | <i>nad3</i> | <i>trnN</i> | <i>trnR</i> </ |
|-------------|--------------|-------------|-------------|-------------|-------------|-------------|-------------|-------------|-------------|-------------|----------------|
