# Supplementary material for: Molecular Phylogeny and Evolution of the Tuerkayana (Decapoda: Brachyura: Gecarcinidae) Genus Based on Whole Mitochondrial Genome Sequences
Source: MDPI journal article supplement (doi:10.3390/biology12070974), 2023-07-08

A

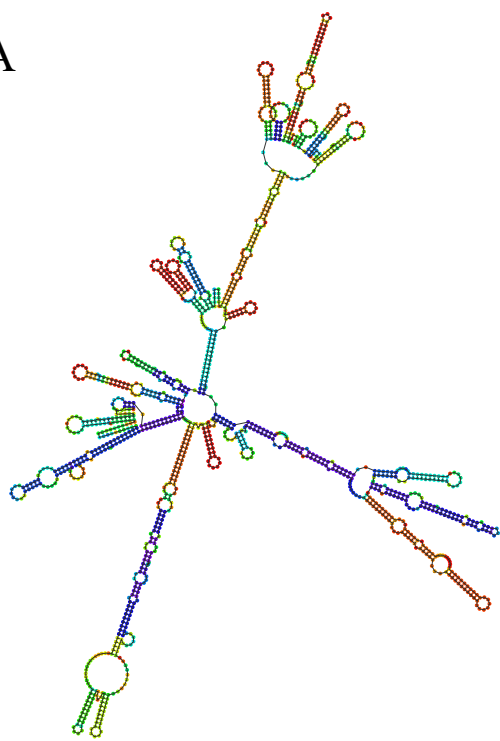

B

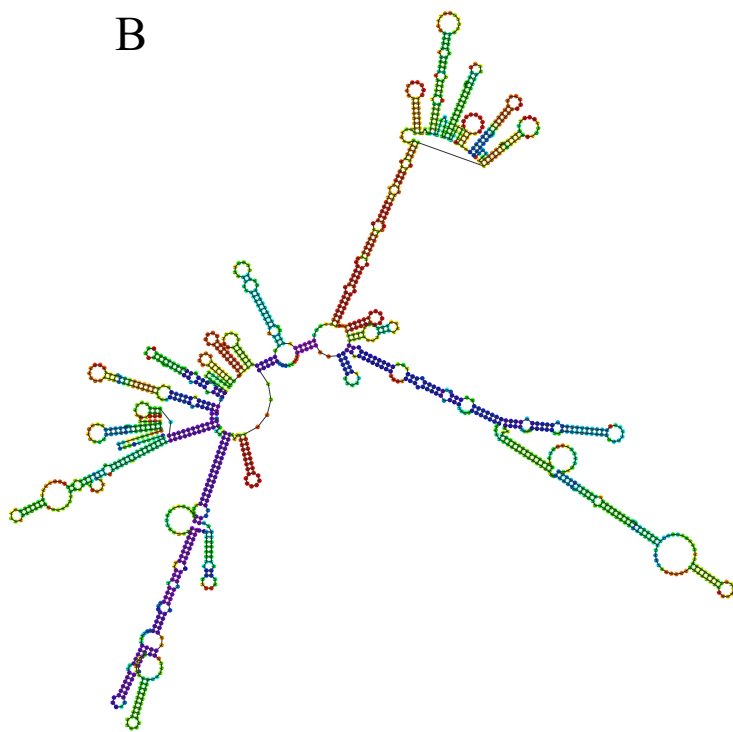

C

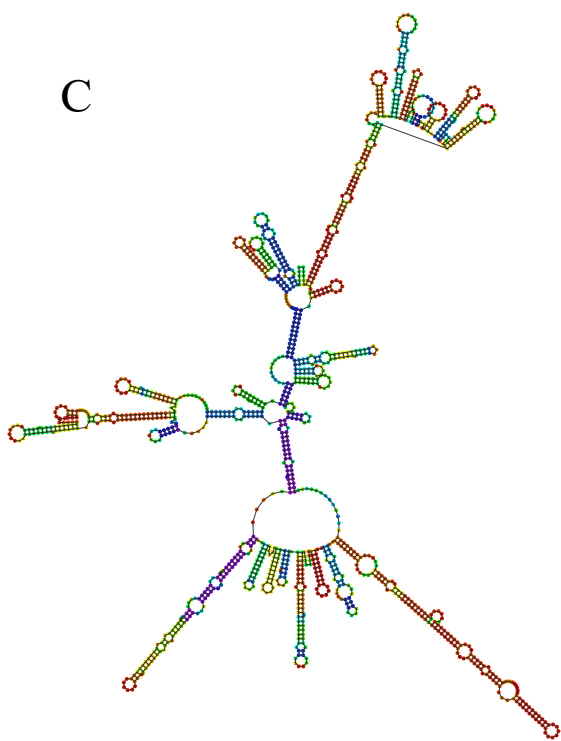

D

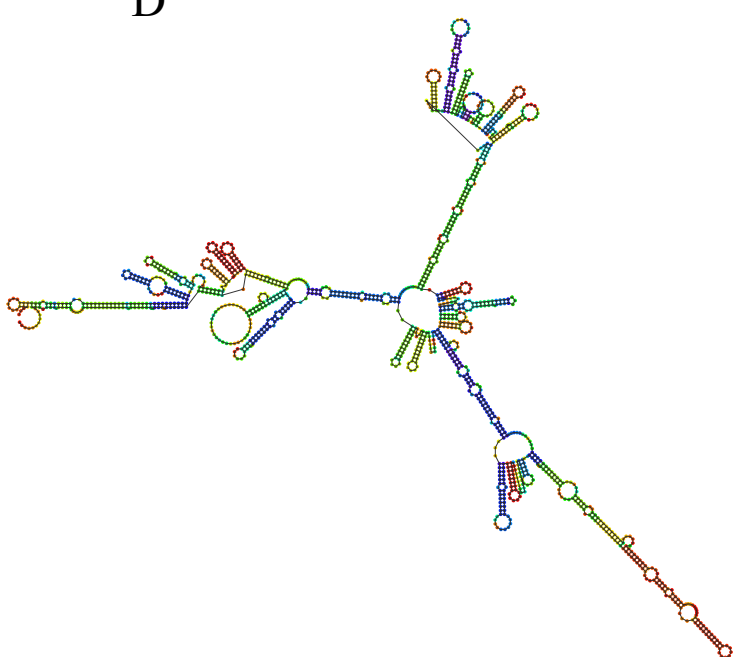A: *Tuerkayana magnum*\_16SrRNAB: *Tuerkayana rotunda*\_16SrRNAC: *Tuerkayana hirtipes*\_16SrRNAD: *Tuerkayana celeste*\_16SrRNA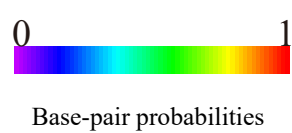

A

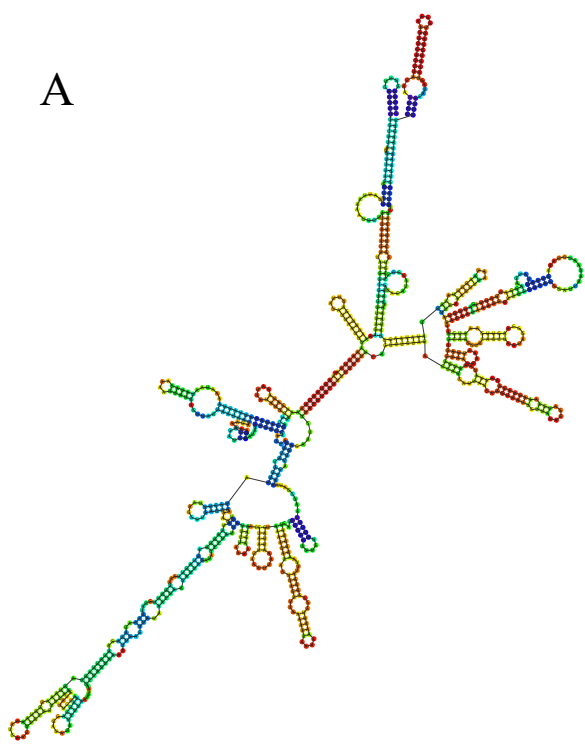

B

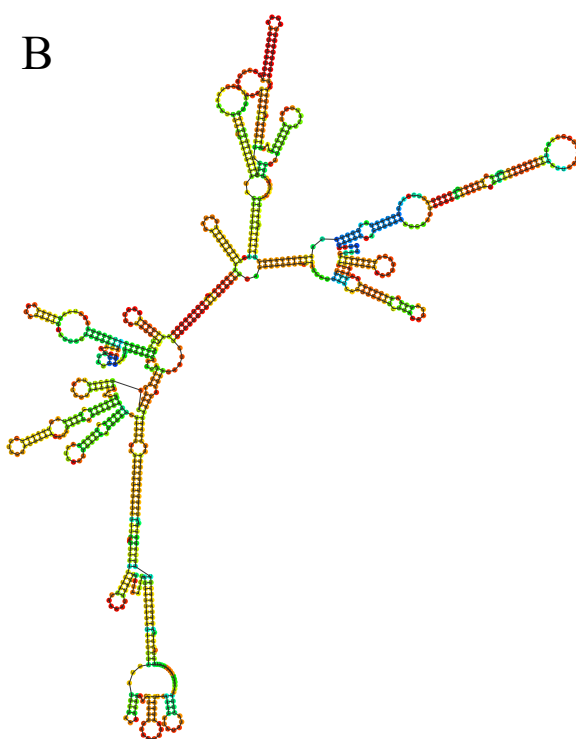

C

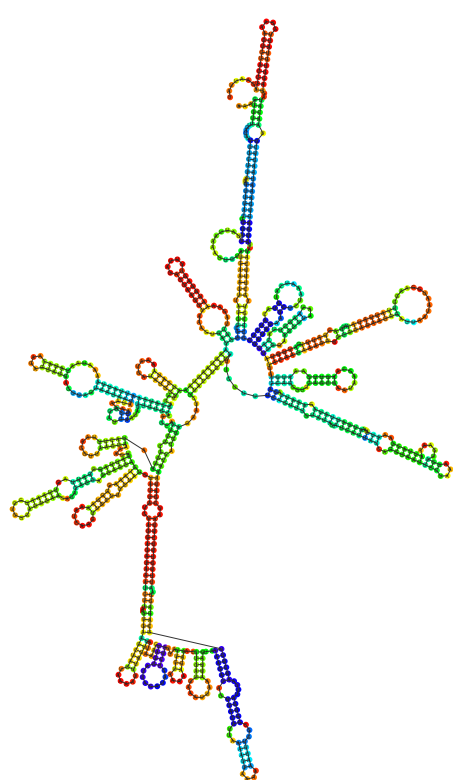

D

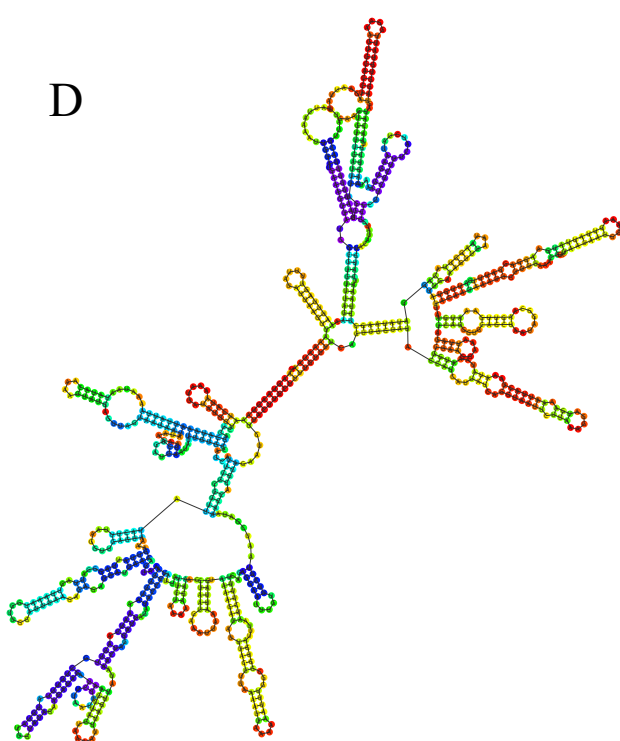A: *Tuerkayana magnum*\_12SrRNAB: *Tuerkayana rotunda*\_12SrRNAC: *Tuerkayana hirtipes*\_12SrRNAD: *Tuerkayana celeste*\_12SrRNA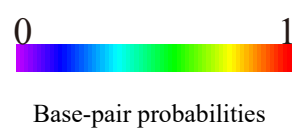

Supplement: s1 [file s1]
