# Supplementary figures and images for: Molecular Phylogeny and Evolution of the Tuerkayana (Decapoda: Brachyura: Gecarcinidae) Genus Based on Whole Mitochondrial Genome Sequences
Source: MDPI journal article supplement (doi:10.3390/biology12070974), 2023-07-08

*ATP6*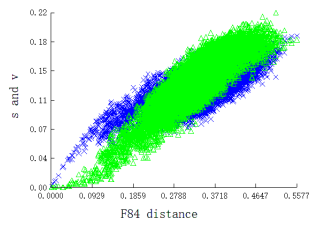*ATP8*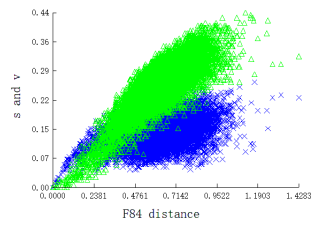*COX1*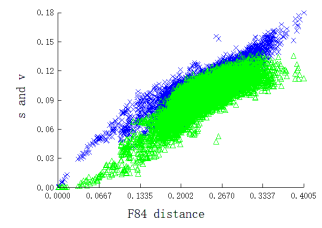*COX2*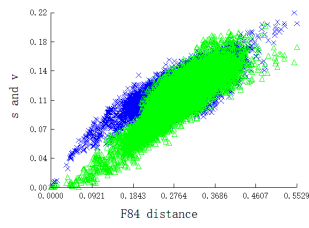*COX3*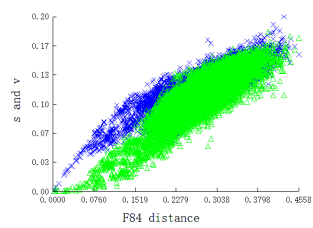*CYTB*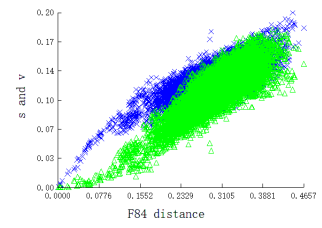*ND1*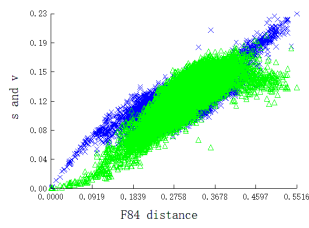*ND2*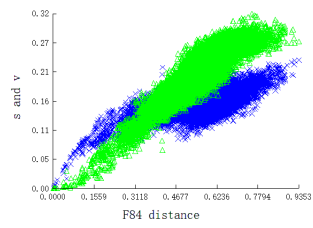*ND3*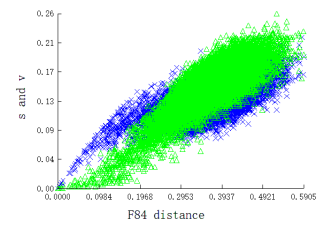*ND4*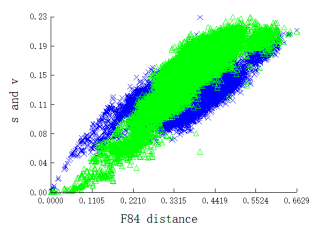*ND4L*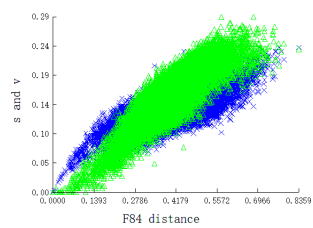*ND5*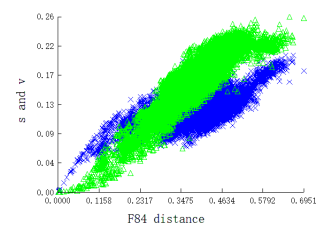*ND6*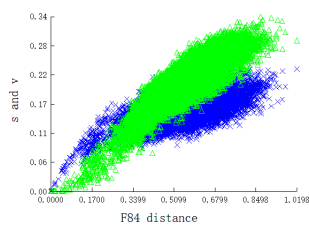

Supplement: s1 [file s1]

tmA

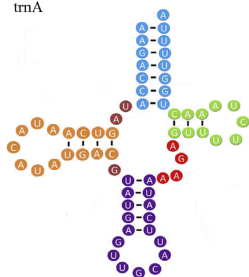

tmC

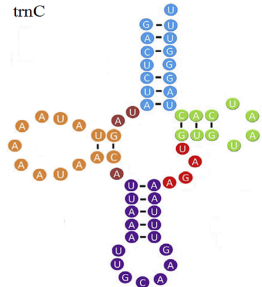

tmD

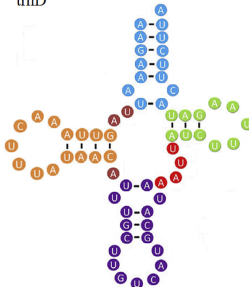

tmE

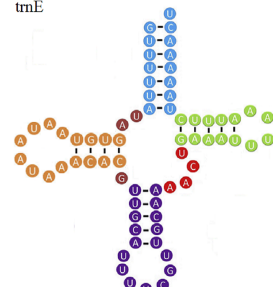

tmF

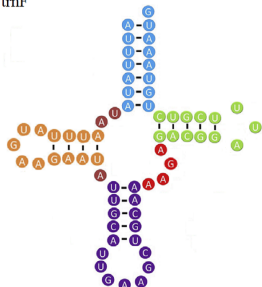

tmG

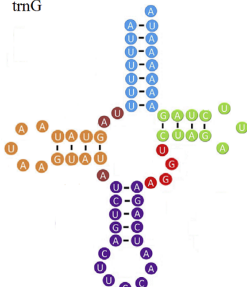

tmH

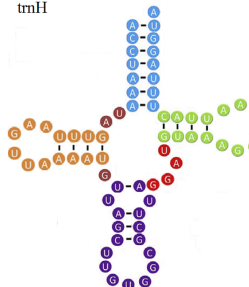

tmI

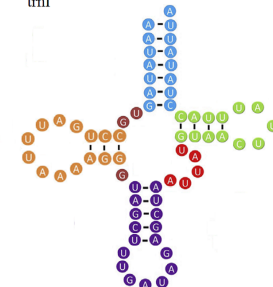

tmK

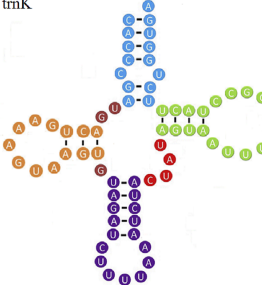

tmL1

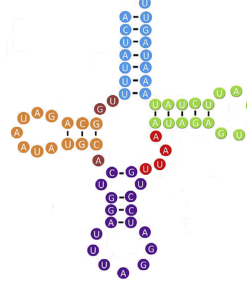

tmL2

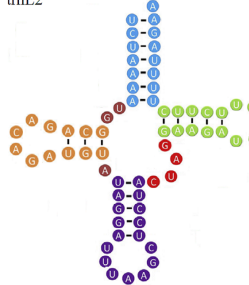

tmM

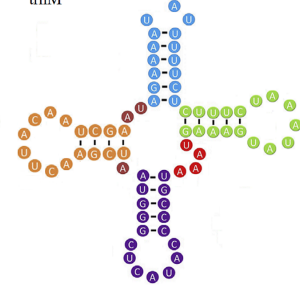

tmN

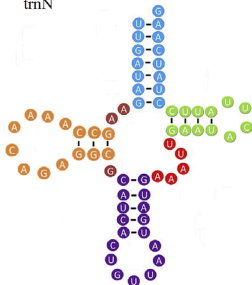

tmP

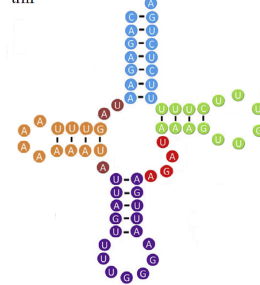

tmQ

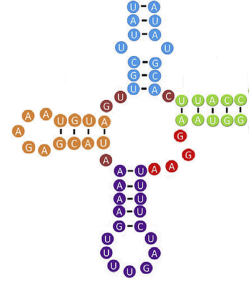

tmR

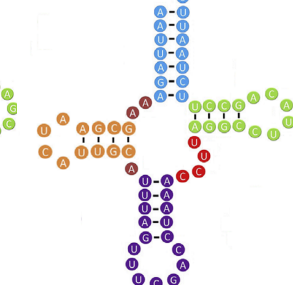

tmS1

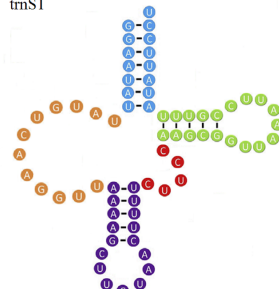

tmS2

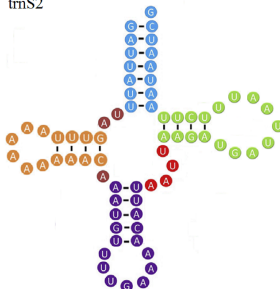

tmT

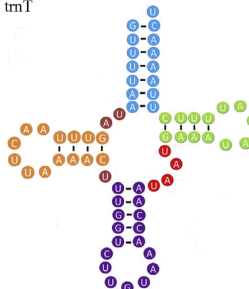

tmV

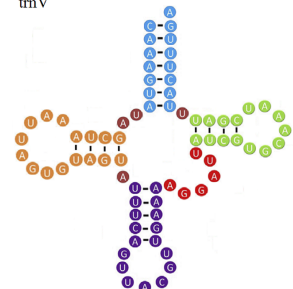

tmW

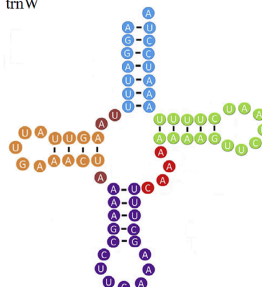

tmY

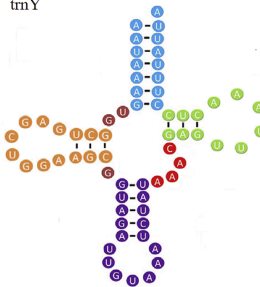

tmF

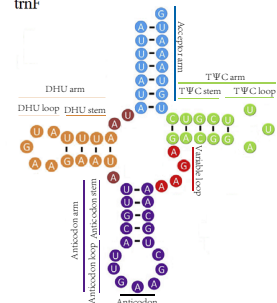

Supplement: s1 [file s1]

*Tuerkayana rotunda*

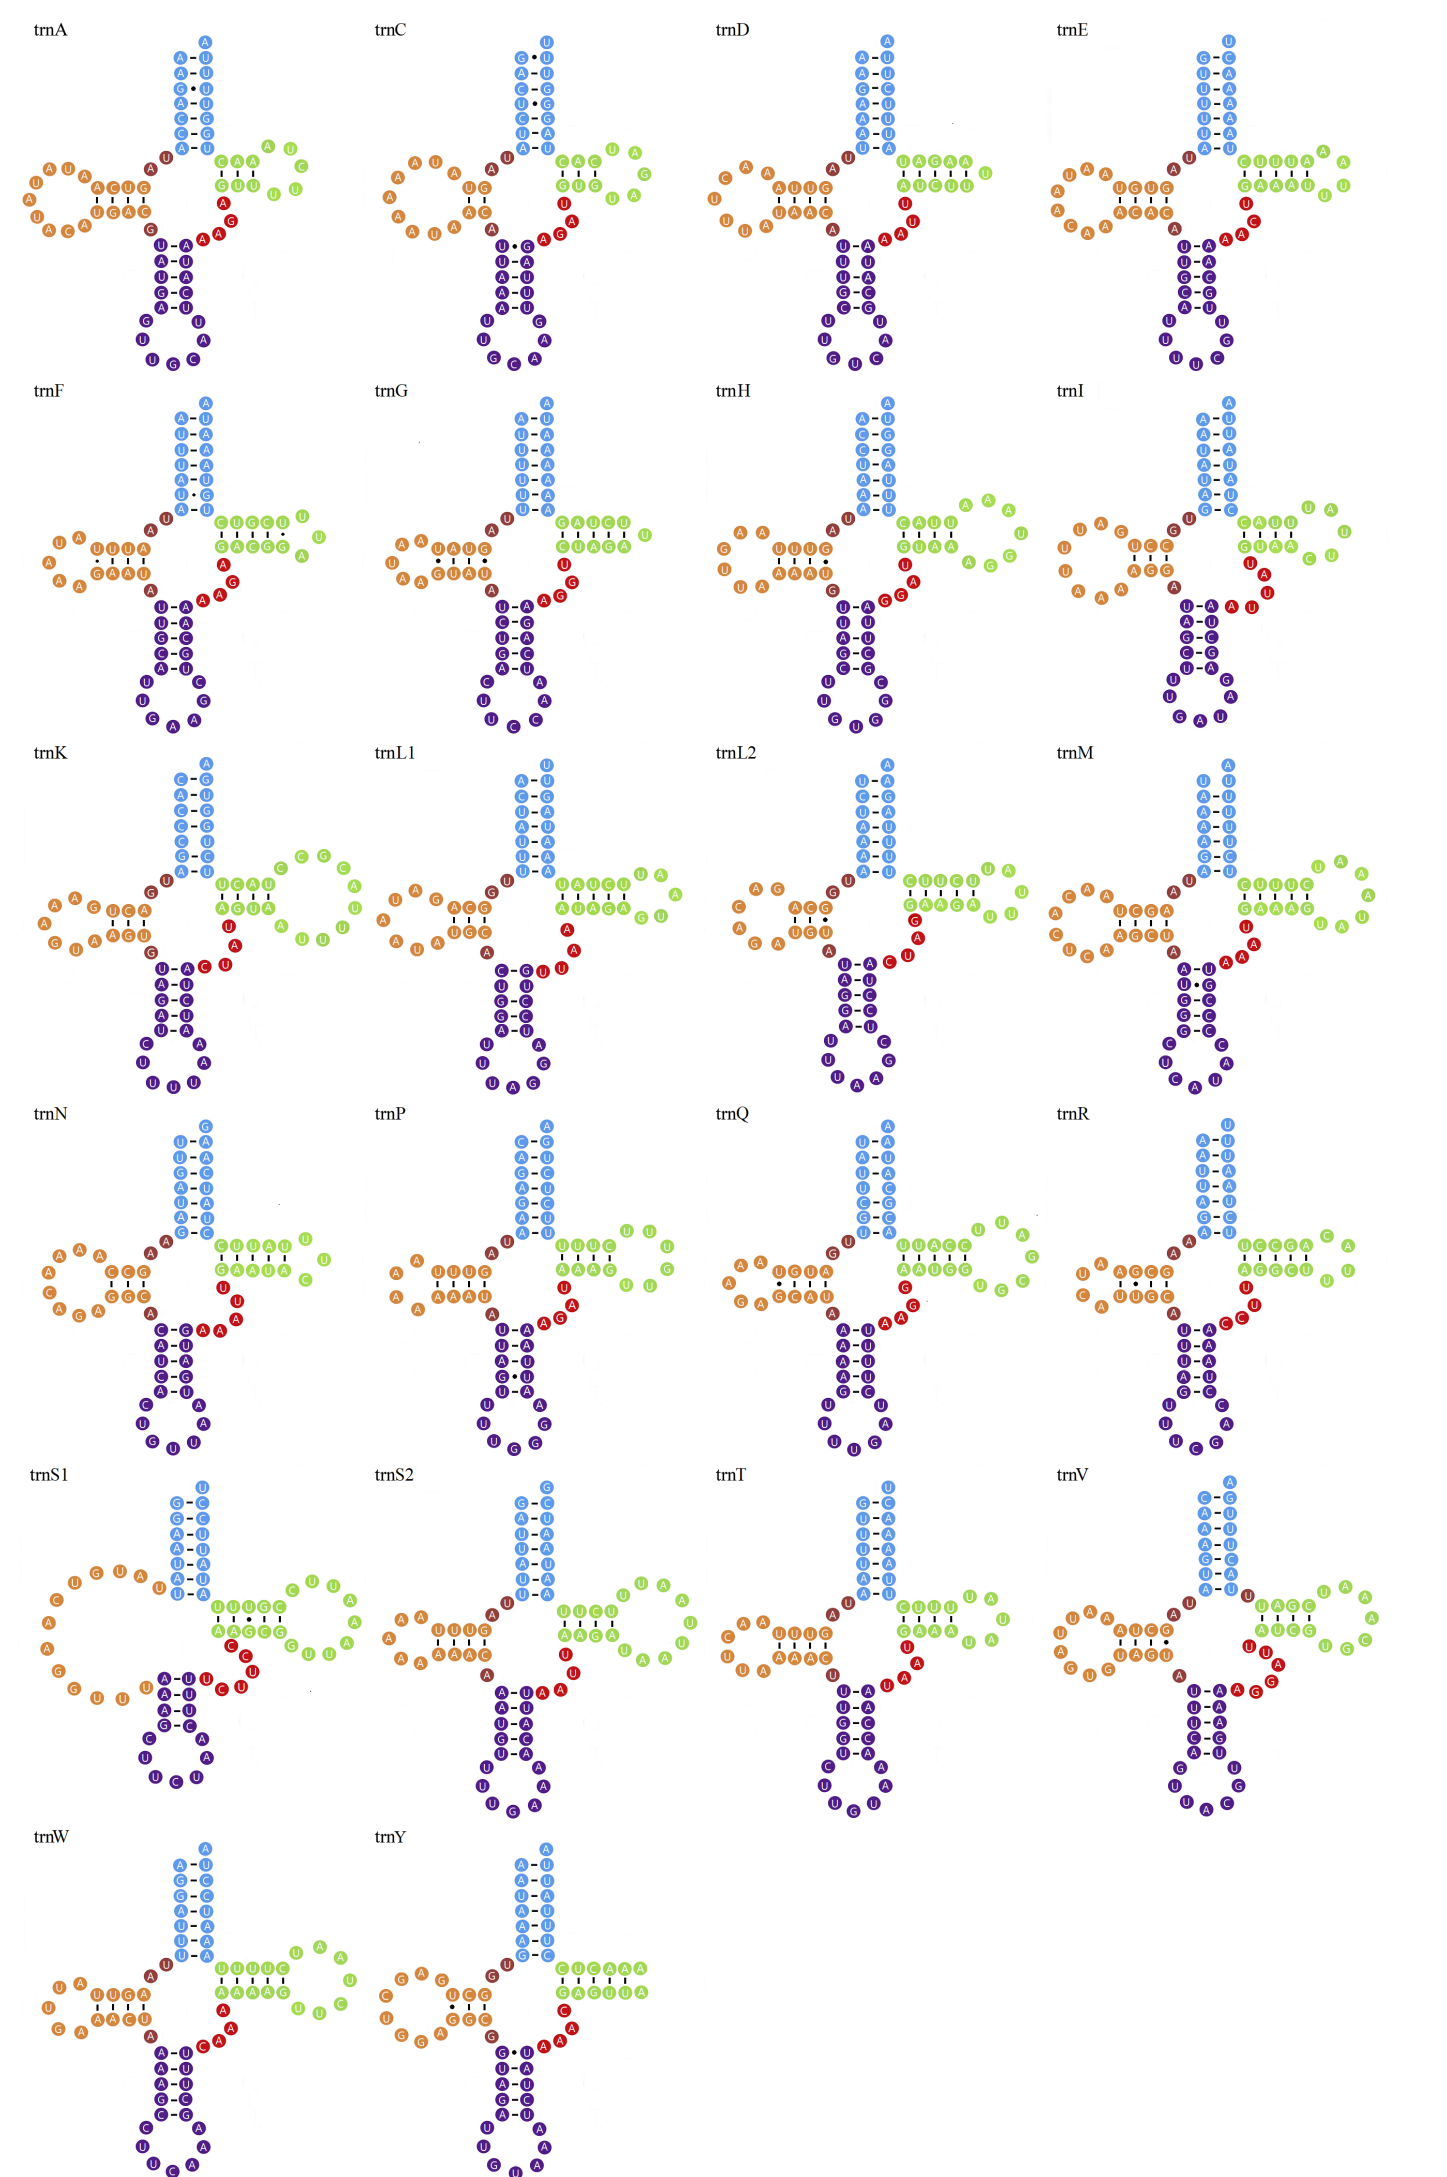

*Tuerkayana hirtipes*

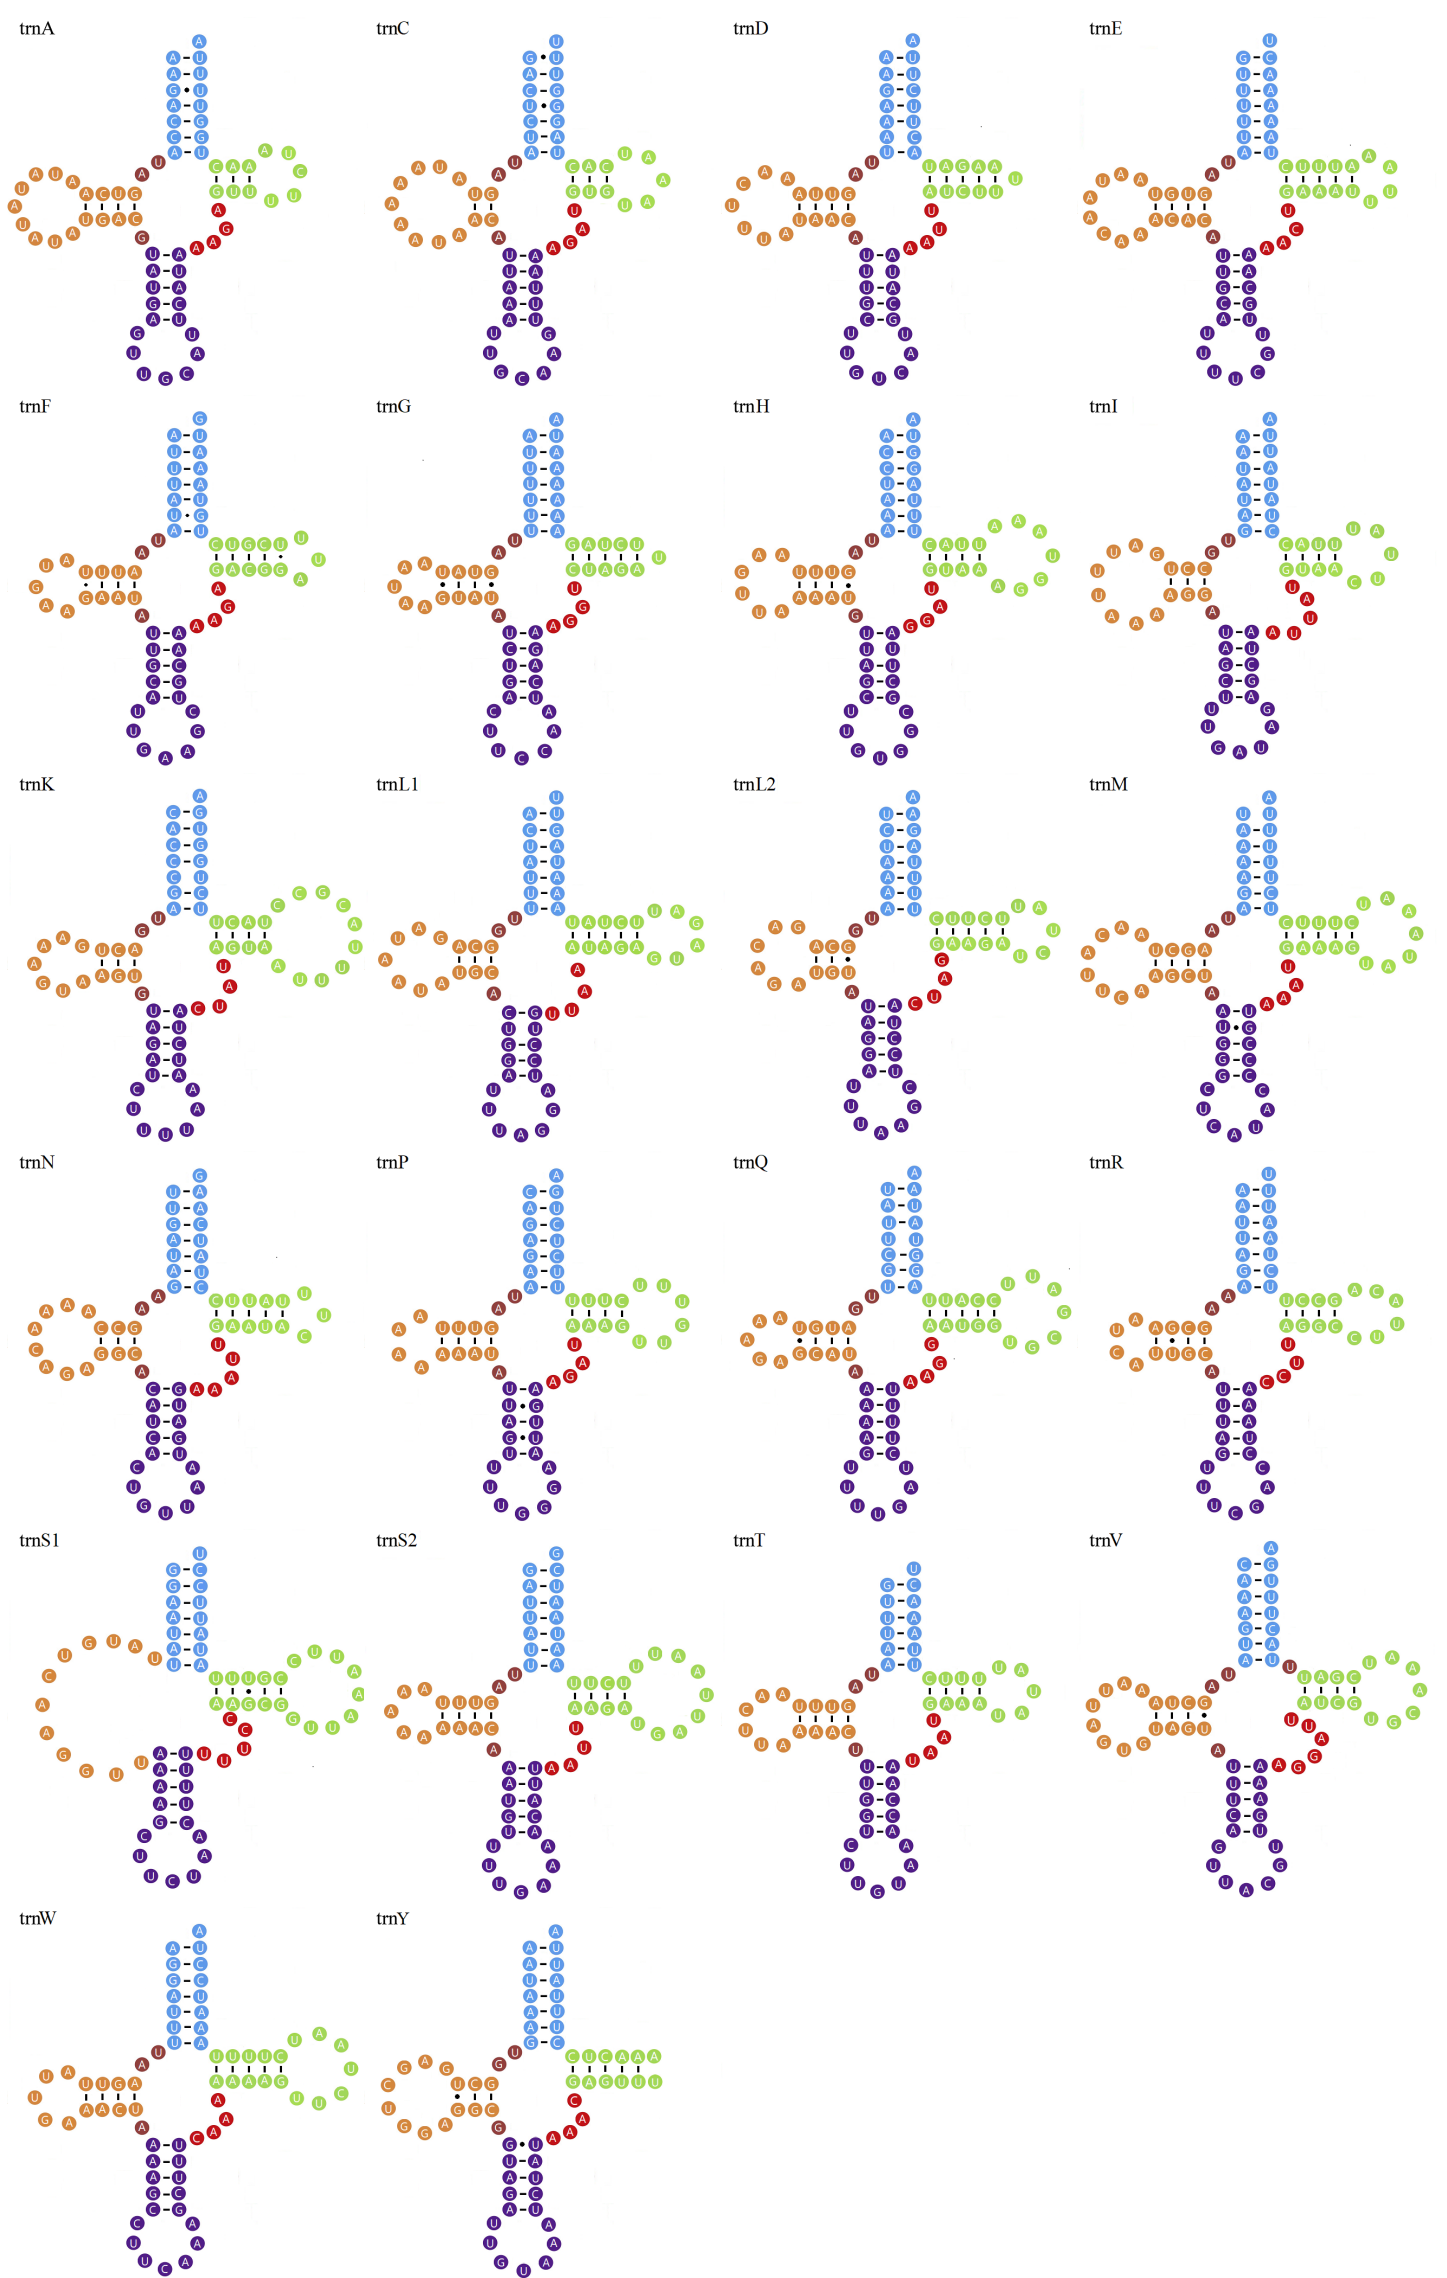

*Tuerkayana celeste*

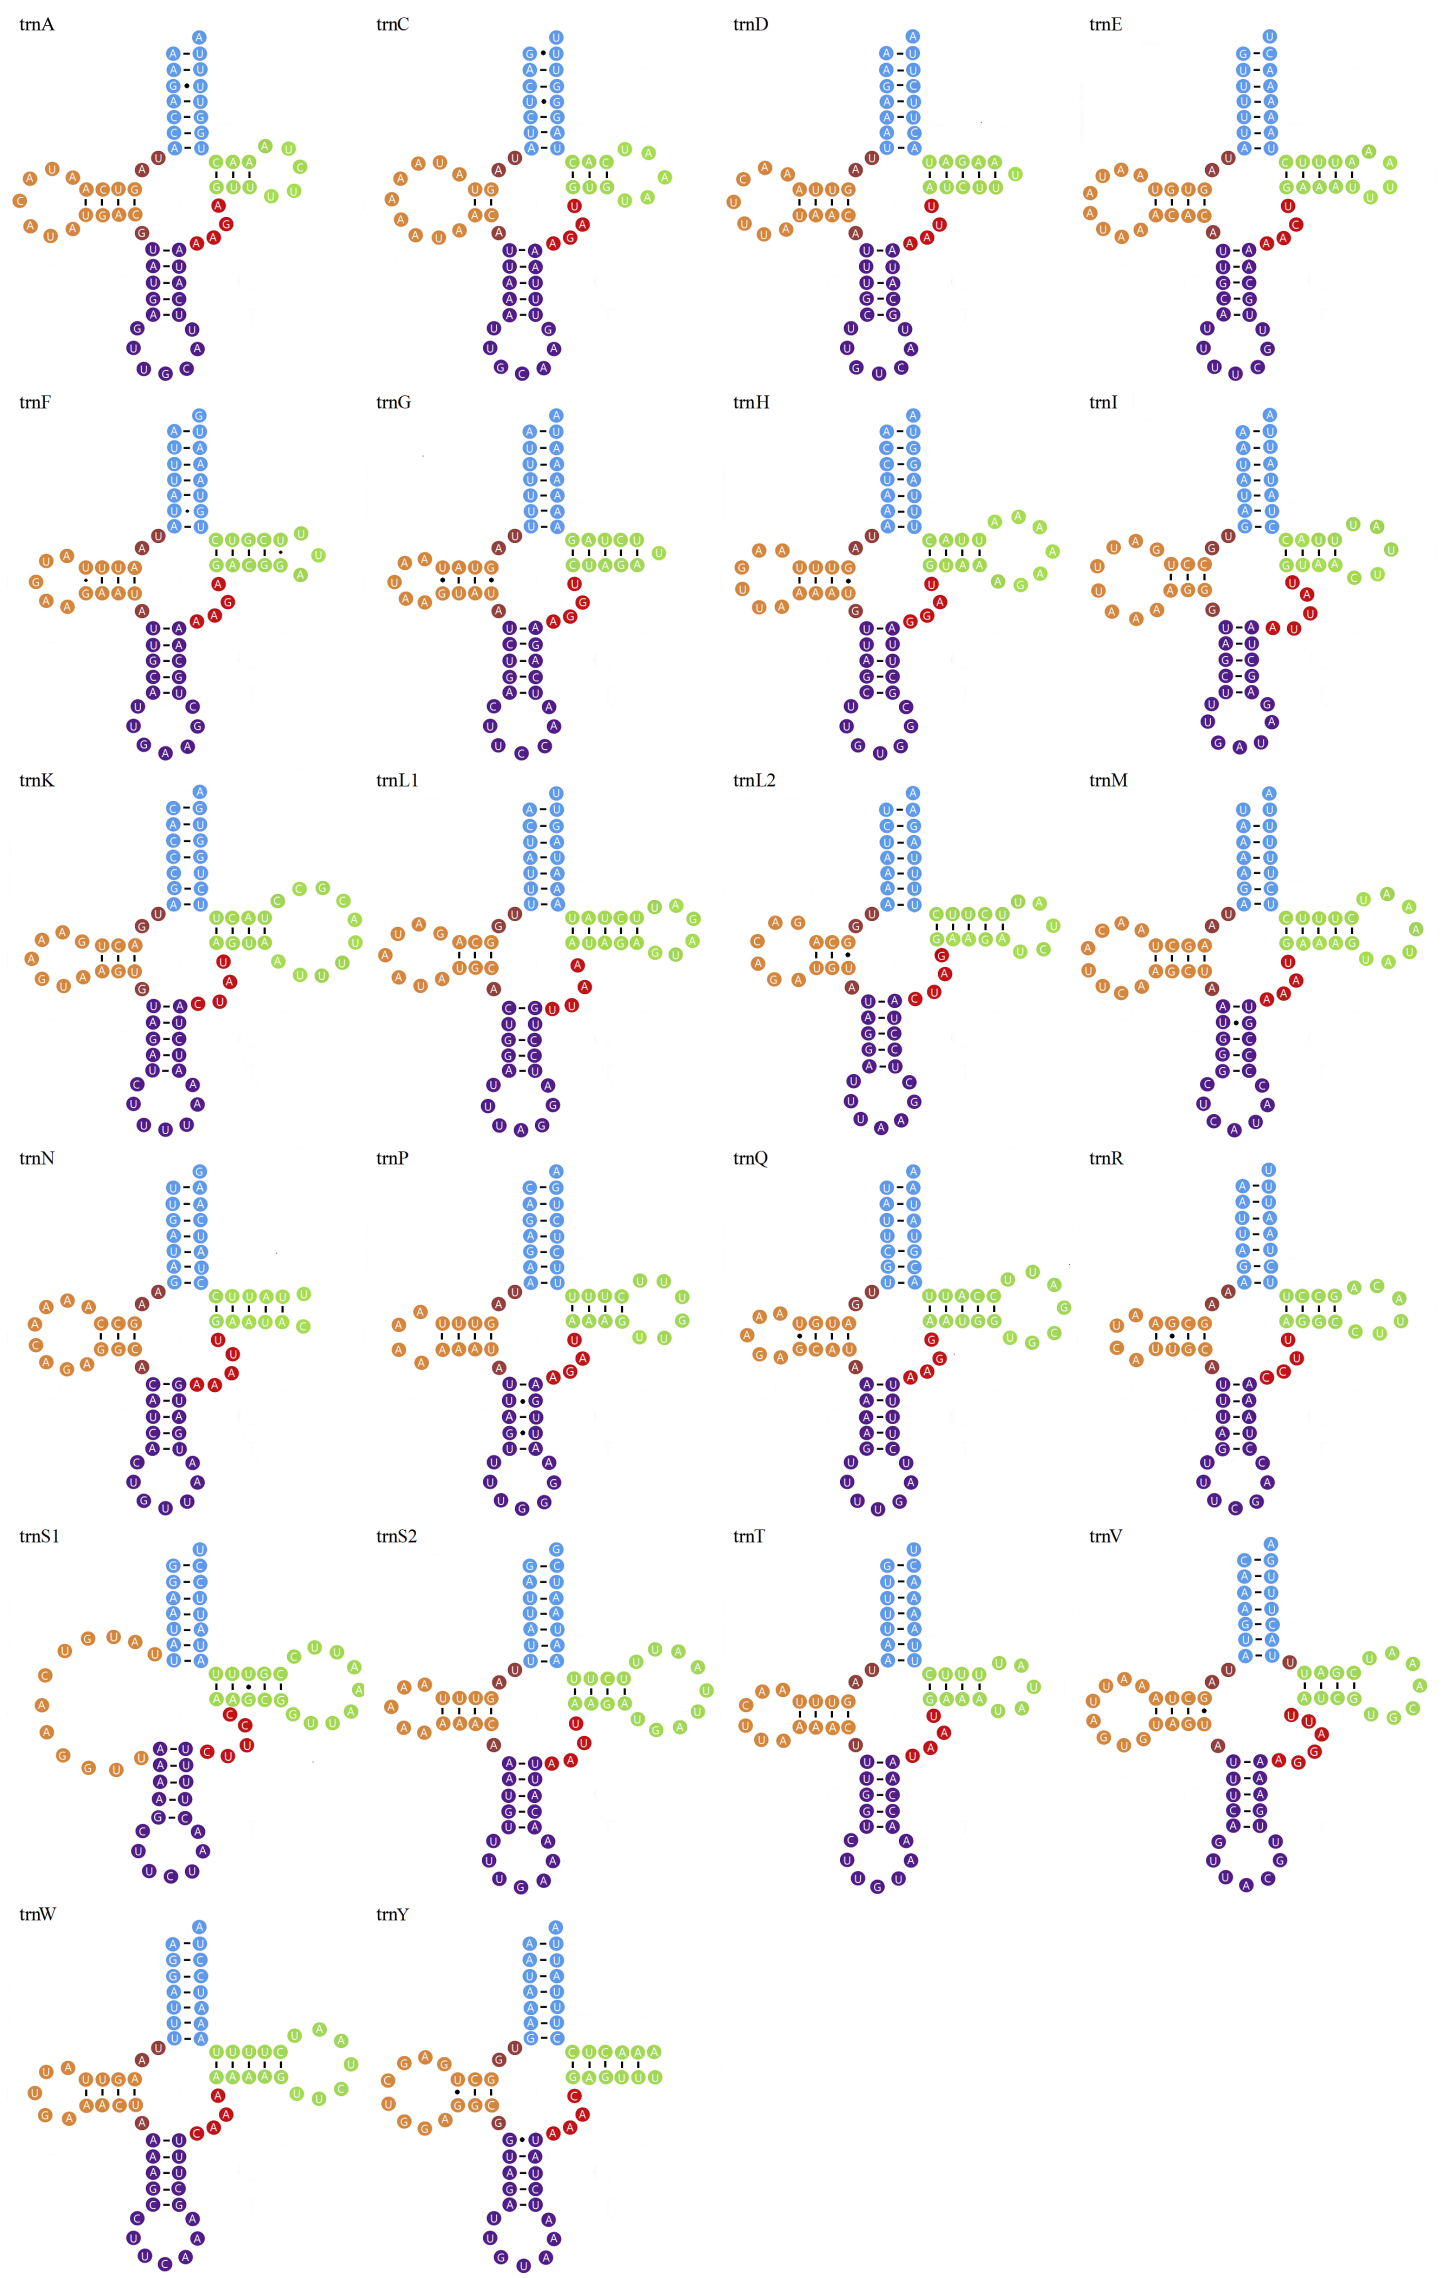

Supplement: s1 [file s1]

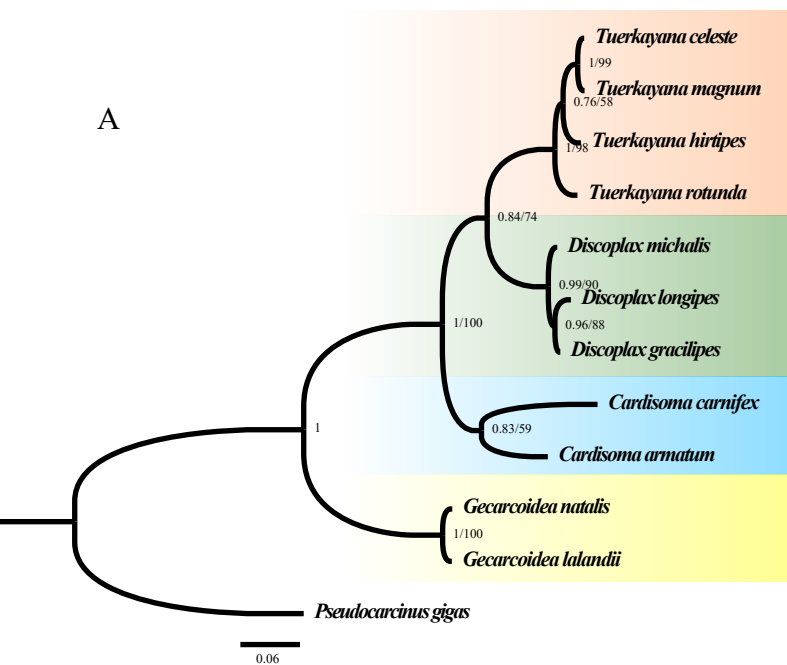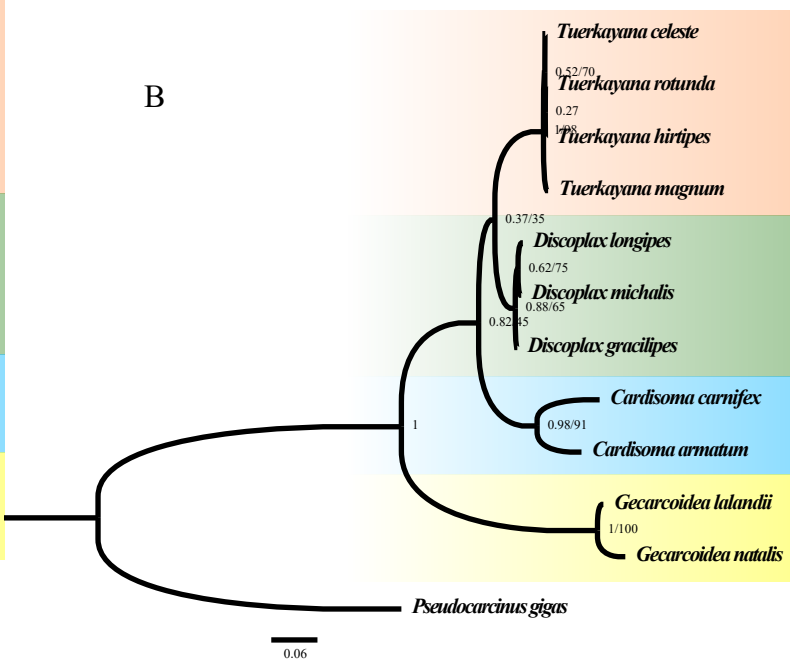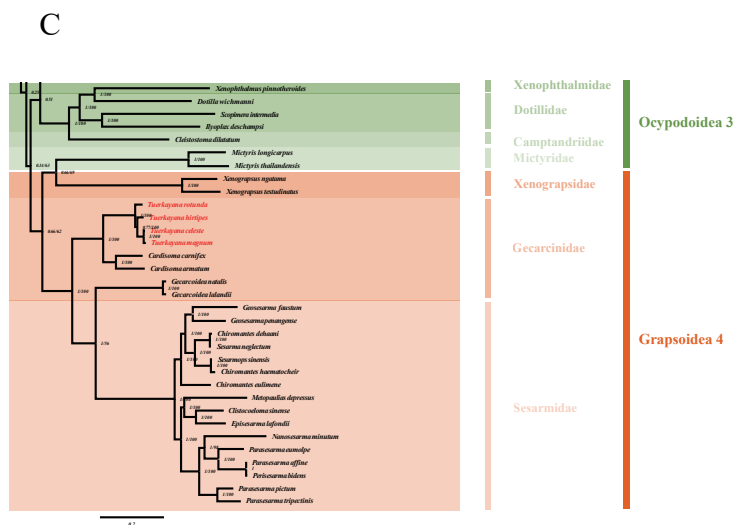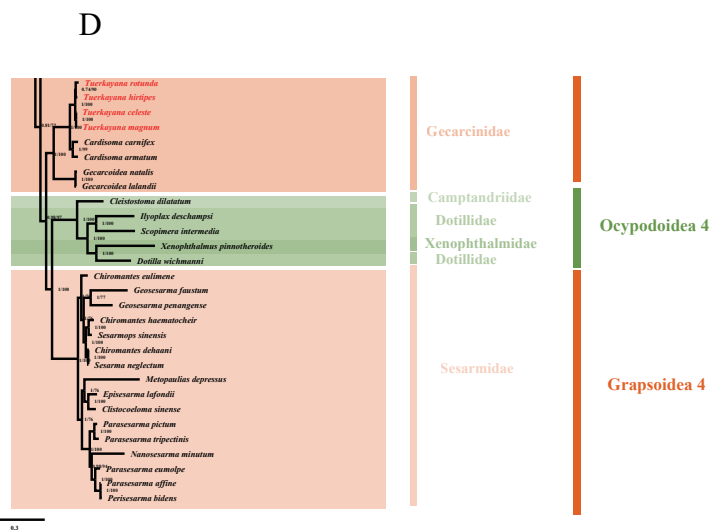

Supplement: s1 [file s1]

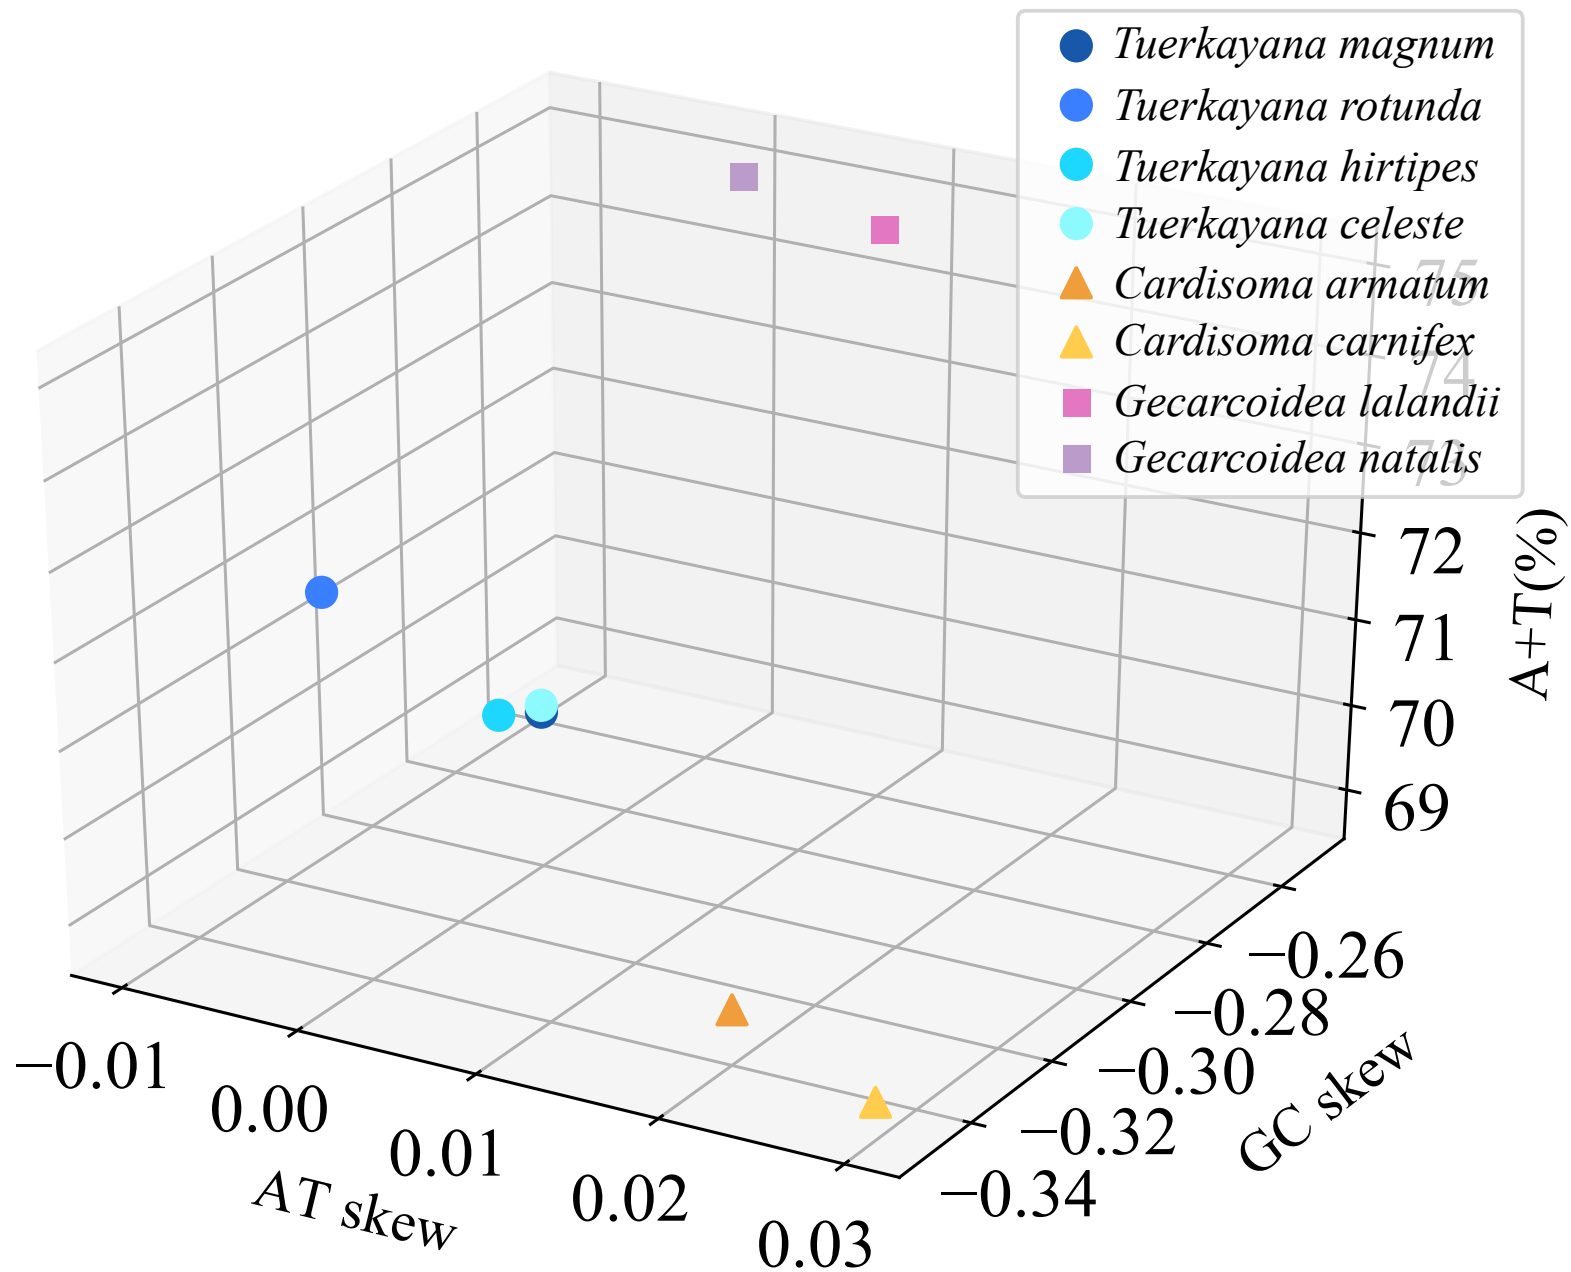

Supplement: s1 [file s1]

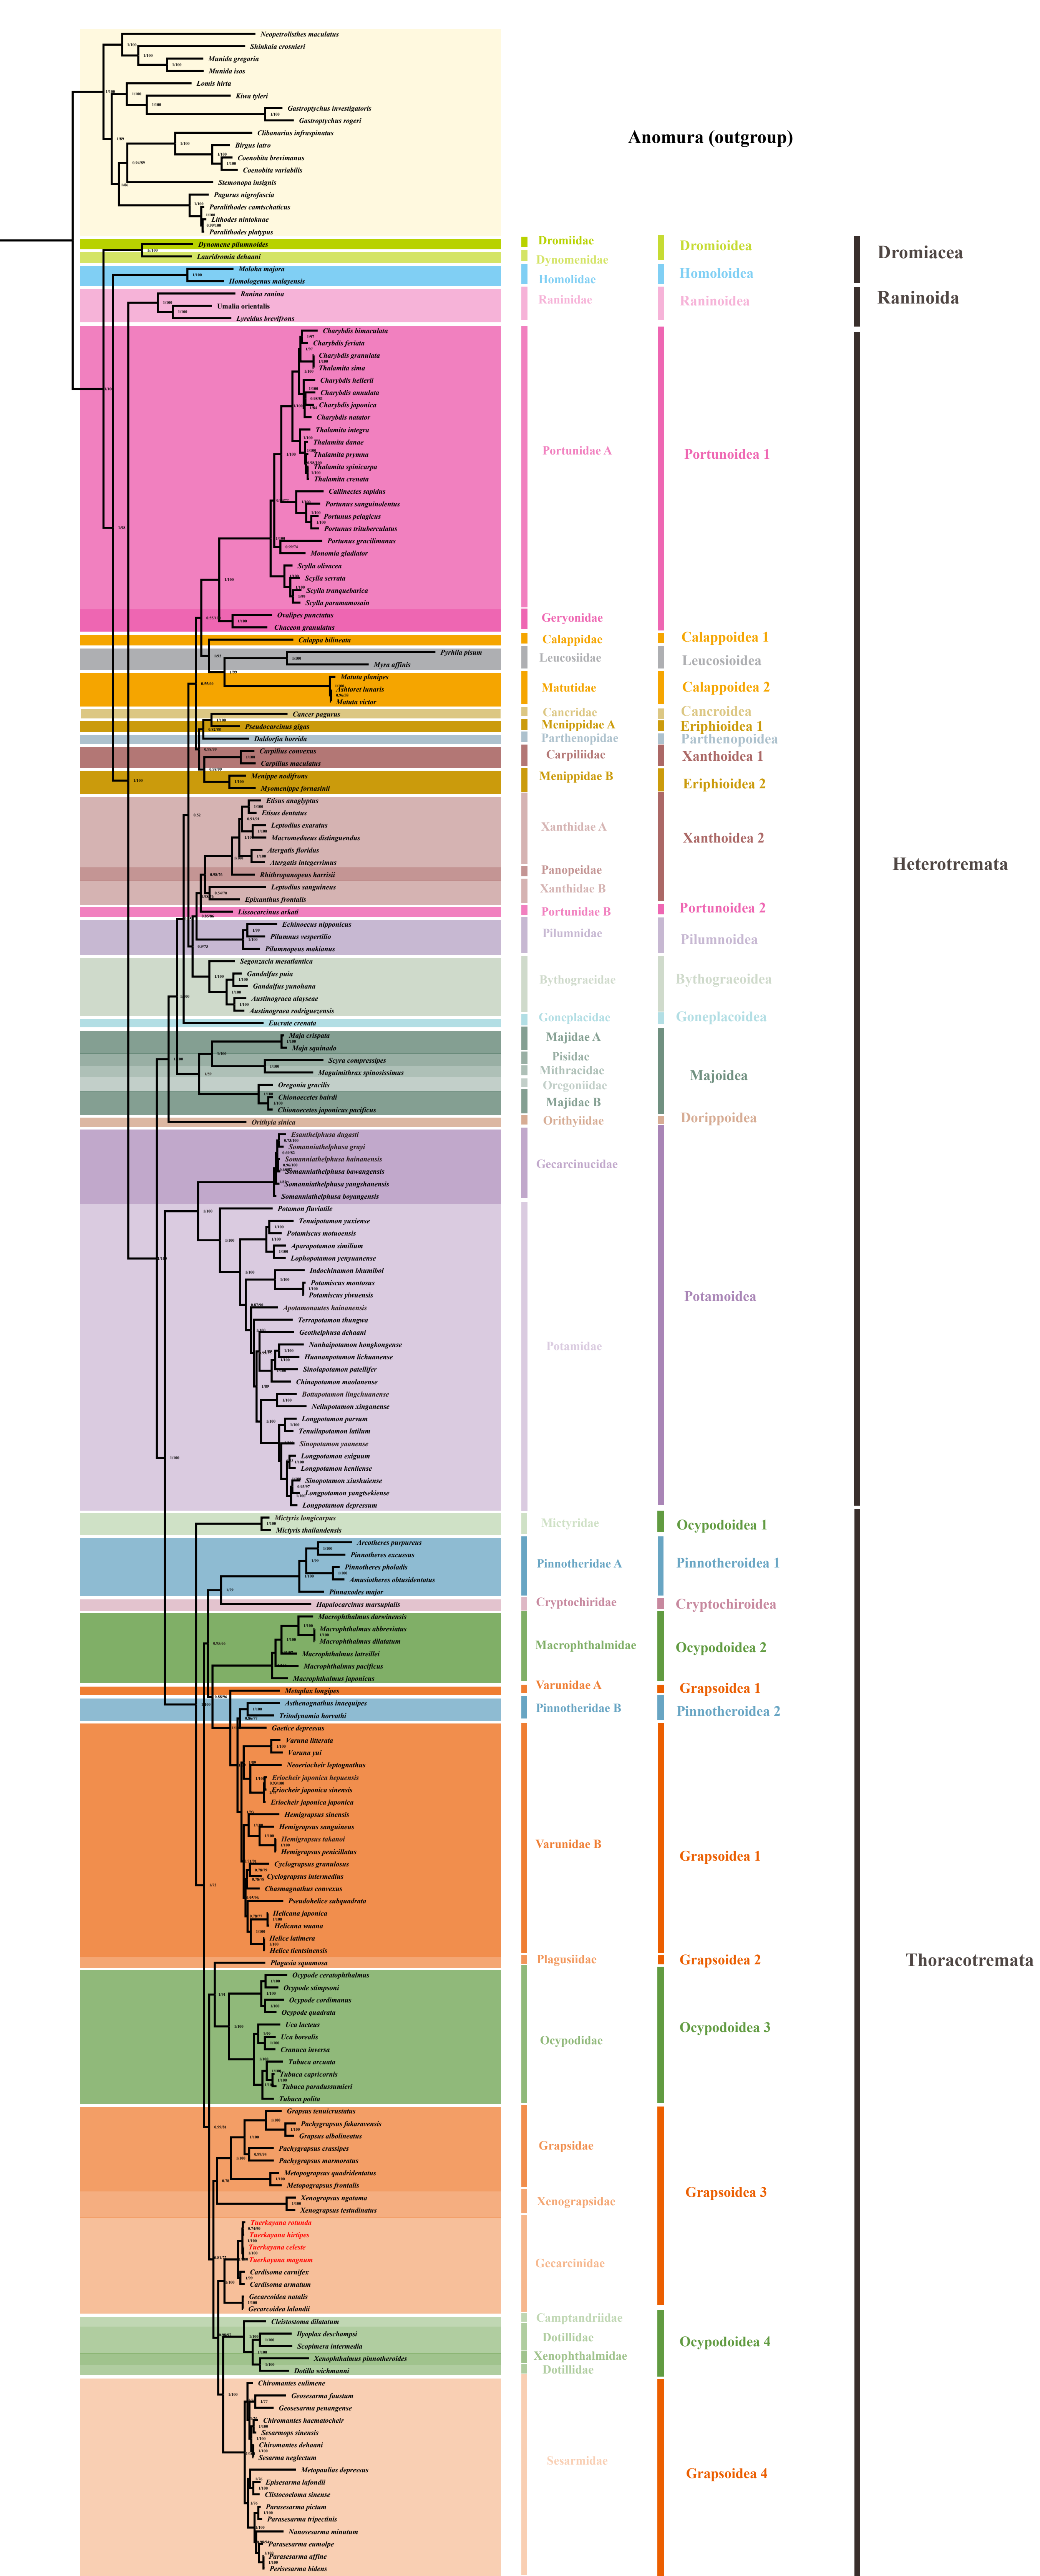

Supplement: s1 [file s1]

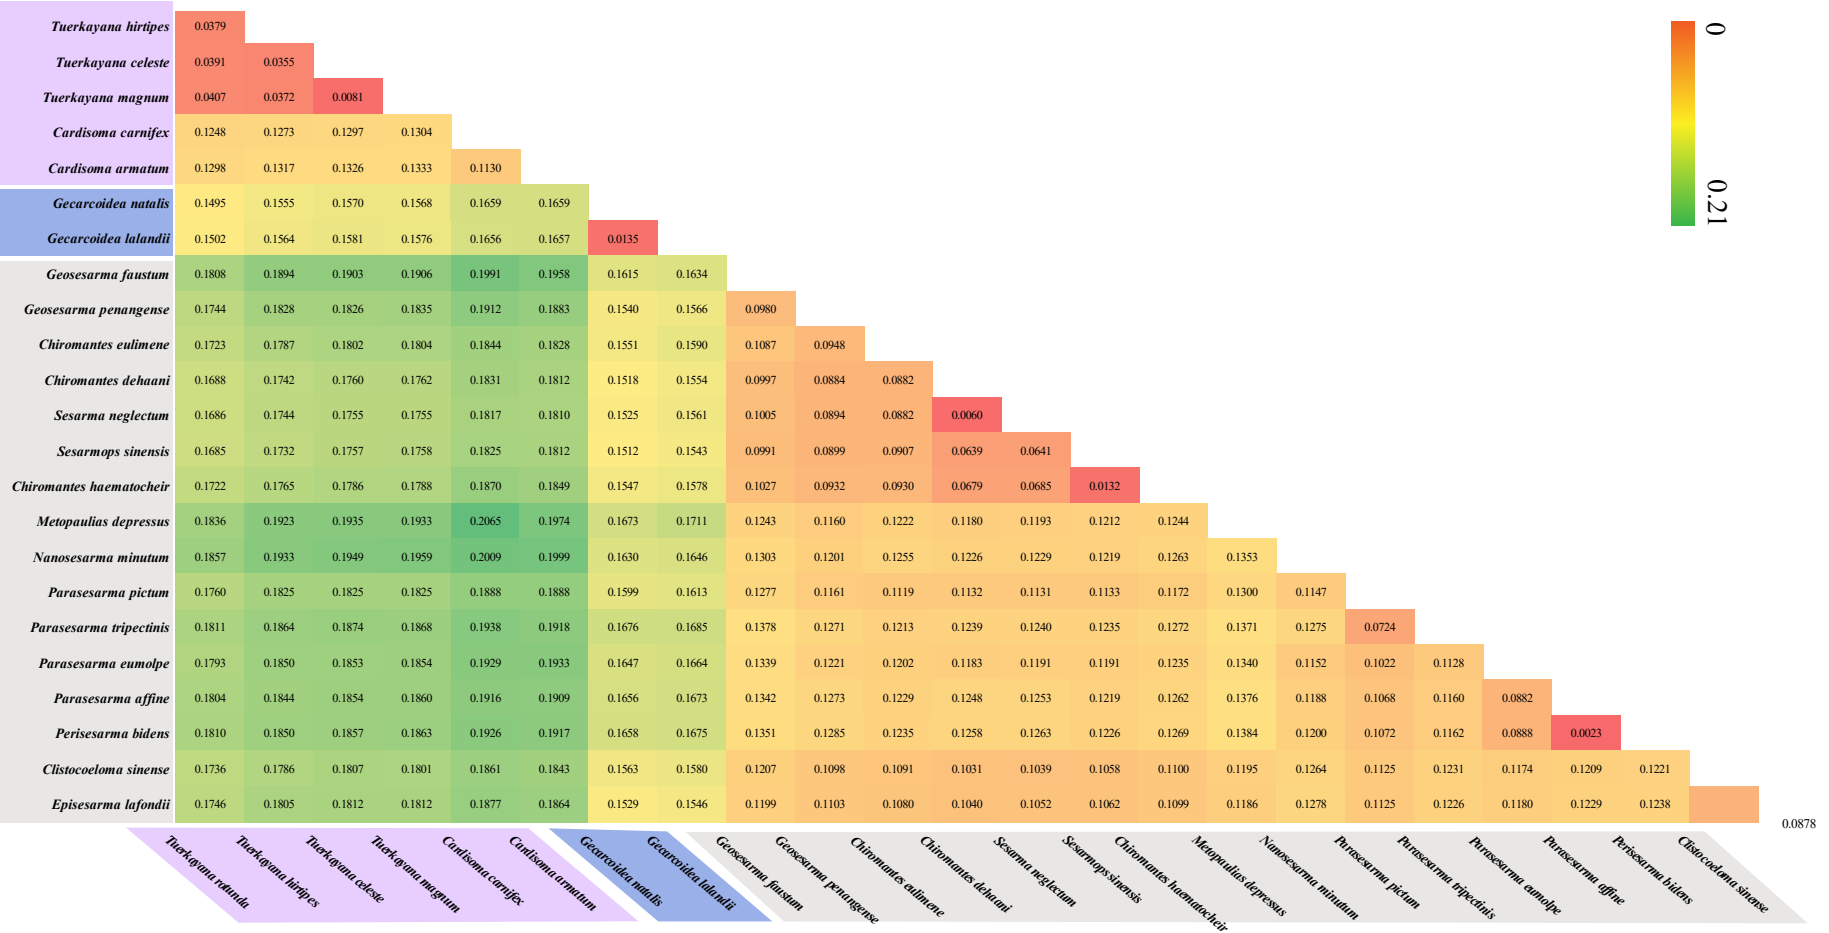

Supplement: s1 [file s1]
